# Supplementary material
Source: PubMed Central journal article supplement (PMC3872785)
Supplement: NIHMS508443-supplement-Supp_Table_1.pdf [file NIHMS508443-supplement-Supp_Table_1.pdf]

| Genes ranked according to p<0.05 in TNFa+IFNg-18h          |          |          |          |          |          |          |          |          |          | 18h - Fold HuR/IgG (reported in Table 1) |           |                 |                                                                                                                |           |           |  |  |  |  |
|------------------------------------------------------------|----------|----------|----------|----------|----------|----------|----------|----------|----------|------------------------------------------|-----------|-----------------|----------------------------------------------------------------------------------------------------------------|-----------|-----------|--|--|--|--|
| 3h - Fold HuR/IgG                                          |          |          |          |          |          |          |          |          |          | Control                                  |           | TNFa+IFNg       |                                                                                                                |           |           |  |  |  |  |
| Symbol                                                     | Ave Fold | Paired T                                 | Symbol    | Gene name       | Description                                                                                                    | Genebank  | UniGene   |  |  |  |  |
| CCL2                                                       | 3.06     | 0.09     | 2.37     | 0.04     | 2.20     | 0.20     | 63.73    | 0.03     |          |                                          | CCL2      | MCP1/SCYA2      | Chemokine (C-C motif) ligand 2                                                                                 | NM_002982 | Hs.303649 |  |  |  |  |
| CXCL1                                                      | 1.42     | 0.18     | 1.68     | 0.04     | 1.24     | 0.33     | 22.47    | 0.04     |          |                                          | CXCL1     | GROa/MGSA       | Chemokine (C-X-C motif) ligand 1 (melanoma growth stimulating activity, alpha)                                 | NM_001511 | Hs.789    |  |  |  |  |
| CCL8                                                       | 1.61     | 0.17     | 1.36     | 0.18     | 1.32     | 0.38     | 22.21    | 0.03     |          |                                          | CCL8      | MCP-2           | Chemokine (C-C motif) ligand 8                                                                                 | NM_005623 | Hs.271387 |  |  |  |  |
| CXCL2                                                      | 1.23     | 0.17     | 1.53     | 0.10     | 0.91     | 0.22     | 18.12    | 0.03     |          |                                          | CXCL2     | MIP-2a/GROb     | Chemokine (C-X-C motif) ligand 2                                                                               | NM_002089 | Hs.75765  |  |  |  |  |
| MAPK8                                                      | 1.57     | 0.20     | 1.06     | 0.26     | 1.68     | 0.44     | 9.14     | 0.03     |          |                                          | MAPK8     | JNK1            | Mitogen-activated protein kinase 8                                                                             | NM_002750 | Hs.445864 |  |  |  |  |
| TGFA                                                       | 1.52     | 0.23     | 1.17     | 0.14     | 1.07     | 0.36     | 8.86     | 0.04     |          |                                          | TGFA      | TGF-a           | Transforming growth factor, alpha                                                                              | NM_003236 | Hs.170009 |  |  |  |  |
| SOC3                                                       | 1.30     | 0.22     | 1.47     | 0.16     | 1.01     | 0.30     | 8.70     | 0.05     |          |                                          | SOC3      | SSI-3           | Suppressor of cytokine signaling 3                                                                             | NM_003955 | Hs.436943 |  |  |  |  |
| CCL20                                                      | 0.87     | 0.15     | 1.16     | 0.17     | 1.11     | 0.36     | 7.03     | 0.04     |          |                                          | CCL20     | MIP-3a/SCYA2C   | Chemokine (C-C motif) ligand 20                                                                                | NM_004591 | Hs.75498  |  |  |  |  |
| IL8                                                        | 1.01     | 0.37     | 0.98     | 0.47     | 1.19     | 0.32     | 6.52     | 0.03     |          |                                          | IL8       | IL-8            | Interleukin 8                                                                                                  | NM_000584 | Hs.624    |  |  |  |  |
| TNFSF11                                                    | 1.02     | 0.33     | 1.11     | 0.32     | 0.83     | 0.25     | 6.32     | 0.05     |          |                                          | TNFSF11   | TRANCE          | Tumor necrosis factor (ligand) superfamily, member 11                                                          | NM_003701 | Hs.333791 |  |  |  |  |
| TRPV6                                                      | 1.41     | 0.21     | 1.38     | 0.00     | 0.82     | 0.09     | 5.50     | 0.04     |          |                                          | TRPV6     | ECAC2/Cat1      | Transient receptor potential cation channel, subfamily V, member 6                                             | NM_018646 | Hs.302740 |  |  |  |  |
| VAV1                                                       | 1.36     | 0.16     | 1.15     | 0.36     | 0.78     | 0.23     | 5.28     | 0.04     |          |                                          | VAV1      | Vav1            | Vav 1 oncogene                                                                                                 | NM_005428 | Hs.116237 |  |  |  |  |
| TNFRSF1B                                                   | 1.61     | 0.19     | 1.24     | 0.01     | 1.16     | 0.28     | 5.26     | 0.03     |          |                                          | TNFRSF1B  | TNFR2/p75       | Tumor necrosis factor receptor superfamily, member 1B                                                          | NM_001066 | Hs.256278 |  |  |  |  |
| TYK2                                                       | 1.39     | 0.13     | 1.23     | 0.00     | 0.92     | 0.29     | 5.22     | 0.01     |          |                                          | TYK2      | Tyk2            | Tyrosine kinase 2                                                                                              | NM_003331 | Hs.75516  |  |  |  |  |
| CSNK2A1                                                    | 1.28     | 0.11     | 1.31     | 0.19     | 1.26     | 0.48     | 5.14     | 0.04     |          |                                          | CSNK2A1   | CK-II alpha     | Casein kinase 2, alpha 1 polypeptide                                                                           | NM_001895 | Hs.446484 |  |  |  |  |
| ITGB7                                                      | 0.95     | 0.29     | 0.84     | 0.20     | 1.00     | 0.44     | 4.97     | 0.05     |          |                                          | ITGB7     | Integrin b7     | Integrin, beta 7                                                                                               | NM_000889 | Hs.1741   |  |  |  |  |
| TNFRSF7                                                    | 1.26     | 0.16     | 1.21     | 0.49     | 0.92     | 0.18     | 4.78     | 0.05     |          |                                          | TNFRSF7   | CD27            | Tumor necrosis factor receptor superfamily, member 7                                                           | NM_001242 | Hs.355307 |  |  |  |  |
| TGFBFR1                                                    | 1.96     | 0.22     | 1.07     | 0.33     | 1.20     | 0.31     | 4.58     | 0.04     |          |                                          | TGFBFR1   | ALK-5/ACVRLK    | Transforming growth factor, beta receptor I (activin A receptor type II-like kinase, 53kDa)                    | NM_004612 | Hs.28005  |  |  |  |  |
| PPP3R1                                                     | 2.22     | 0.05     | 1.31     | 0.02     | 1.46     | 0.10     | 4.50     | 0.02     |          |                                          | PPP3R1    | CALN1B          | Protein phosphatase 3 (formerly 2B), regulatory subunit B, 19kDa, alpha isoform (calcineurin B, type I)        | NM_000945 | Hs.286064 |  |  |  |  |
| TNFRSF21                                                   | 1.43     | 0.14     | 1.13     | 0.23     | 0.99     | 0.29     | 4.48     | 0.04     |          |                                          | TNFRSF21  | TNFRSF21        | Tumor necrosis factor receptor superfamily, member 21                                                          | NM_014452 | Hs.159651 |  |  |  |  |
| RNF110                                                     | 1.23     | 0.04     | 0.94     | 0.19     | 0.77     | 0.11     | 4.30     | 0.01     |          |                                          | RNF110    | ZNF144          | Ring finger protein 110                                                                                        | NM_007144 | Hs.371617 |  |  |  |  |
| IL6                                                        | 0.99     | 0.49     | 0.88     | 0.15     | 1.02     | 0.29     | 4.17     | 0.02     |          |                                          | IL6       | IL-6            | Interleukin 6 (interferon, beta 2)                                                                             | NM_000600 | Hs.512234 |  |  |  |  |
| MAP3K2                                                     | 1.18     | 0.01     | 0.95     | 0.31     | 0.98     | 0.32     | 4.05     | 0.04     |          |                                          | MAP3K2    | MEKK2           | Mitogen-activated protein kinase kinase kinase 2                                                               | NM_006609 | Hs.28827  |  |  |  |  |
| TGFBFR2                                                    | 1.18     | 0.34     | 0.91     | 0.14     | 1.05     | 0.25     | 4.00     | 0.05     |          |                                          | TGFBFR2   | TGFBFR2         | Transforming growth factor, beta receptor II (70/80kDa)                                                        | NM_003242 | Hs.82028  |  |  |  |  |
| TRAF1                                                      | 1.10     | 0.29     | 1.00     | 0.28     | 0.91     | 0.23     | 3.87     | 0.04     |          |                                          | TRAF1     | TRAF1           | TNF receptor-associated factor 1                                                                               | NM_005658 | Hs.223474 |  |  |  |  |
| CSNK2B                                                     | 1.15     | 0.29     | 1.02     | 0.48     | 0.93     | 0.15     | 3.53     | 0.01     |          |                                          | CSNK2B    | CK-II beta      | Casein kinase 2, beta polypeptide                                                                              | NM_001320 | Hs.73527  |  |  |  |  |
| SMAD2                                                      | 1.22     | 0.03     | 0.89     | 0.29     | 1.03     | 0.26     | 2.45     | 0.05     |          |                                          | SMAD2     | MADH2           | SMAD, mothers against DPP homolog 2 (Drosophila)                                                               | NM_005901 | Hs.110741 |  |  |  |  |
| Genes ranked according to p = 0.05 to 0.1 in TNFa+IFNg-18h |          |          |          |          |          |          |          |          |          | 18h - Fold HuR/IgG                       |           |                 |                                                                                                                |           |           |  |  |  |  |
| 3h - Fold HuR/IgG                                          |          |          |          |          |          |          |          |          |          | Control                                  |           | TNFa+IFNg       |                                                                                                                |           |           |  |  |  |  |
| Symbol                                                     | Ave Fold | Paired T                                 | Symbol    | Gene name       | Description                                                                                                    | Genebank  | UniGene   |  |  |  |  |
| JUND                                                       | 5.48     | 0.18     | 2.80     | 0.20     | 4.64     | 0.17     | 49.81    | 0.14     |          |                                          | JUND      | Jun-D           | Jun D proto-oncogene                                                                                           | NM_005354 | Hs.2780   |  |  |  |  |
| CCL13                                                      | 1.32     | 0.32     | 1.46     | 0.20     | 1.16     | 0.33     | 20.77    | 0.09     |          |                                          | CCL13     | MCP-4           | Chemokine (C-C motif) ligand 13                                                                                | NM_005408 | Hs.414629 |  |  |  |  |
| TGIF                                                       | 1.95     | 0.22     | 1.51     | 0.18     | 1.70     | 0.22     | 20.04    | 0.12     |          |                                          | TGIF      | TGIF            | TGFB-induced factor (TALE family homeobox)                                                                     | NM_003244 | Hs.161999 |  |  |  |  |
| ATF2                                                       | 2.86     | 0.20     | 1.25     | 0.23     | 2.90     | 0.21     | 18.17    | 0.10     |          |                                          | ATF2      | Creb-2          | Activating transcription factor 2                                                                              | NM_001880 | Hs.80285  |  |  |  |  |
| MAX                                                        | 2.34     | 0.14     | 1.33     | 0.13     | 1.99     | 0.27     | 17.26    | 0.07     |          |                                          | MAX       | Max             | MAX protein                                                                                                    | NM_002382 | Hs.42712  |  |  |  |  |
| RUNX1                                                      | 2.28     | 0.18     | 1.49     | 0.17     | 1.74     | 0.31     | 12.15    | 0.07     |          |                                          | RUNX1     | AML1            | Runt-related transcription factor 1 (acute myeloid leukemia 1; aml1 oncogene)                                  | NM_001754 | Hs.410774 |  |  |  |  |
| SP3                                                        | 2.39     | 0.18     | 1.20     | 0.23     | 1.61     | 0.14     | 5.61     | 0.08     |          |                                          | SP3       | Sp3             | Sp3 transcription factor                                                                                       | NM_003111 | Hs.154295 |  |  |  |  |
| CCL7                                                       | 0.80     | 0.09     | 1.01     | 0.31     | 1.01     | 0.27     | 4.35     | 0.10     |          |                                          | CCL7      | MCP-3           | Chemokine (C-C motif) ligand 7                                                                                 | NM_006273 | Hs.251526 |  |  |  |  |
| ELK3                                                       | 1.30     | 0.02     | 1.21     | 0.13     | 1.19     | 0.34     | 4.03     | 0.05     |          |                                          | ELK3      | Elk-3           | ELK3, ETS-domain protein (SRF accessory protein 2)                                                             | NM_005230 | Hs.288555 |  |  |  |  |
| TNFSF6                                                     | 1.04     | 0.32     | 1.10     | 0.31     | 0.99     | 0.27     | 3.94     | 0.09     |          |                                          | TNFSF6    | Fas ligand      | Tumor necrosis factor (ligand) superfamily, member 6                                                           | NM_000639 | Hs.2007   |  |  |  |  |
| VEGF                                                       | 1.03     | 0.23     | 0.97     | 0.31     | 0.85     | 0.18     | 2.84     | 0.08     |          |                                          | VEGF      | VEGF            | Vascular endothelial growth factor                                                                             | NM_003376 | Hs.73793  |  |  |  |  |
| CXCL3                                                      | 0.84     | 0.46     | 1.03     | 0.23     | 0.62     | 0.02     | 12.28    | 0.16     |          |                                          | CXCL3     | GRO3            | Chemokine (C-X-C motif) ligand 3                                                                               | NM_002090 | Hs.89690  |  |  |  |  |
| ZFPM2                                                      | 1.38     | 0.18     | 1.23     | 0.13     | 0.67     | 0.10     | 8.13     | 0.10     |          |                                          | ZFPM2     | FOG2            | Zinc finger protein, multiple 2                                                                                | NM_012082 | Hs.106309 |  |  |  |  |
| SOC3                                                       | 1.72     | 0.21     | 1.11     | 0.31     | 1.24     | 0.48     | 6.03     | 0.06     |          |                                          | SOC3      | SOC3            | Suppressor of cytokine signaling 3                                                                             | XM_294897 | Hs.270564 |  |  |  |  |
| RUNX2                                                      | 1.11     | 0.30     | 1.11     | 0.41     | 1.11     | 0.48     | 5.98     | 0.05     |          |                                          | RUNX2     | CBFA1           | Runt-related transcription factor 2                                                                            | NM_004348 | Hs.122116 |  |  |  |  |
| ACVR2                                                      | 1.23     | 0.31     | 1.36     | 0.21     | 1.21     | 0.37     | 5.59     | 0.06     |          |                                          | ACVR2     | ACVR2           | Activin A receptor, type II                                                                                    | NM_001616 | Hs.389846 |  |  |  |  |
| CCL19                                                      | 0.98     | 0.37     | 1.26     | 0.19     | 1.07     | 0.32     | 5.16     | 0.07     |          |                                          | CCL19     | MCP-3b/SCYA1    | Chemokine (C-C motif) ligand 19                                                                                | NM_006274 | Hs.50002  |  |  |  |  |
| LTB4R                                                      | 1.81     | 0.18     | 1.09     | 0.22     | 1.18     | 0.46     | 5.10     | 0.06     |          |                                          | LTB4R     | GPR16           | Leukotriene B4 receptor                                                                                        | NM_181657 | Hs.445013 |  |  |  |  |
| CCL18                                                      | 0.96     | 0.24     | 1.25     | 0.19     | 1.03     | 0.30     | 4.95     | 0.09     |          |                                          | CCL18     | PARC            | Chemokine (C-C motif) ligand 18 (pulmonary and activation-regulated)                                           | NM_002988 | Hs.16530  |  |  |  |  |
| CCR3                                                       | 0.94     | 0.16     | 1.26     | 0.21     | 0.94     | 0.27     | 4.93     | 0.13     |          |                                          | CCR3      | CCR3            | Chemokine (C-C motif) receptor 3                                                                               | NM_001837 | Hs.506190 |  |  |  |  |
| TGFBFR3                                                    | 1.06     | 0.39     | 1.09     | 0.31     | 0.97     | 0.24     | 4.85     | 0.09     |          |                                          | TGFBFR3   | TGFBFR3         | Transforming growth factor, beta receptor III (betaglycan, 300kDa)                                             | NM_003243 | Hs.342874 |  |  |  |  |
| VAV3                                                       | 0.99     | 0.45     | 1.06     | 0.28     | 0.89     | 0.32     | 4.85     | 0.07     |          |                                          | VAV3      | Vav3            | Vav 3 oncogene                                                                                                 | NM_006113 | Hs.267659 |  |  |  |  |
| ORM1                                                       | 0.98     | 0.48     | 0.89     | 0.21     | 1.16     | 0.31     | 4.83     | 0.14     |          |                                          | ORM1      | AGP1            | Orosomucoid 1                                                                                                  | NM_000607 | Hs.528635 |  |  |  |  |
| CCR5                                                       | 0.82     | 0.06     | 1.01     | 0.33     | 0.88     | 0.34     | 4.82     | 0.10     |          |                                          | CCR5      | CCR5            | Chemokine (C-C motif) receptor 5                                                                               | NM_000579 | Hs.54443  |  |  |  |  |
| OPRD1                                                      | 0.92     | 0.33     | 0.94     | 0.24     | 0.91     | 0.27     | 4.81     | 0.13     |          |                                          | OPRD1     | DOR1            | Opioid receptor, delta 1                                                                                       | NM_000911 | Hs.372    |  |  |  |  |
| BCL2                                                       | 0.89     | 0.16     | 0.89     | 0.22     | 1.03     | 0.28     | 4.71     | 0.11     |          |                                          | BCL2      | Bcl-2           | B-cell CLL/lymphoma 2                                                                                          | NM_000633 | Hs.79241  |  |  |  |  |
| AGT                                                        | 0.91     | 0.30     | 1.08     | 0.47     | 1.21     | 0.37     | 4.65     | 0.13     |          |                                          | AGT       | Angiotensinogen | Angiotensinogen (serine (or cysteine) proteinase inhibitor, clade A (alpha-1 antiproteinase, antitrypsin), mer | NM_000029 | Hs.19383  |  |  |  |  |
| ICAM3                                                      | 1.00     | 0.34     | 1.00     | 0.23     | 0.83     | 0.29     | 4.64     | 0.11     |          |                                          | ICAM3     | ICAM3           | Intercellular adhesion molecule 3                                                                              | NM_002162 | Hs.353214 |  |  |  |  |
| ACVRL1                                                     | 0.92     | 0.24     | 1.04     | 0.44     | 1.08     | 0.31     | 4.62     | 0.12     |          |                                          | ACVRL1    | ALK-1           | Activin A receptor type II-like 1                                                                              | NM_000020 | Hs.410104 |  |  |  |  |
| IL12B                                                      | 0.87     | 0.14     | 1.12     | 0.43     | 0.90     | 0.22     | 4.59     | 0.14     |          |                                          | IL12B     | IL-12B          | Interleukin 12B (natural killer cell stimulatory factor 2, cytotoxic lymphocyte maturation factor 2, p40)      | NM_002187 | Hs.674    |  |  |  |  |
| COL3A1                                                     | 0.84     | 0.19     | 0.86     | 0.22     | 1.04     | 0.31     | 4.58     | 0.14     |          |                                          | COL3A1    | COL3A1          | Collagen, type III, alpha 1 (Ehlers-Danlos syndrome type IV, autosomal dominant)                               | NM_000090 | Hs.443625 |  |  |  |  |
| IFNB1                                                      | 0.87     | 0.13     | 0.97     | 0.27     | 1.11     | 0.30     | 4.58     | 0.14     |          |                                          | IFNB1     | IFN-b1          | Interferon, beta 1, fibroblast                                                                                 | NM_002176 | Hs.93177  |  |  |  |  |
| NCAM1                                                      | 0.92     | 0.27     | 1.02     | 0.32     | 1.02     | 0.27     | 4.55     | 0.13     |          |                                          | NCAM1     | NCAM            | Neural cell adhesion molecule 1                                                                                | NM_000615 | Hs.78792  |  |  |  |  |
| LTB4R2                                                     | 1.01     | 0.39     | 1.00     | 0.32     | 0.89     | 0.26     | 4.51     | 0.10     |          |                                          | LTB4R2    | LTB4R2          | Leukotriene B4 receptor 2                                                                                      | NM_019839 | Hs.130685 |  |  |  |  |
| TLR9                                                       | 0.96     | 0.40     | 0.90     | 0.20     | 0.85     | 0.22     | 4.49     | 0.11     |          |                                          | TLR9      | TLR9            | Toll-like receptor 9                                                                                           | NM_017442 | Hs.87968  |  |  |  |  |
| PTPRC                                                      | 0.92     | 0.07     | 1.04     | 0.35     | 0.86     | 0.26     | 4.47     | 0.13     |          |                                          | PTPRC     | Cd45            | Protein tyrosine phosphatase, receptor type, C                                                                 | NM_002838 | Hs.444324 |  |  |  |  |
| TNFRSF11A                                                  | 1.09     | 0.39     | 1.12     | 0.41     | 0.82     | 0.11     | 4.45     | 0.10     |          |                                          | TNFRSF11A | Rank            | Tumor necrosis factor receptor superfamily, member 11a, activator of NFkB                                      | NM_003839 | Hs.204044 |  |  |  |  |
| TLR5                                                       | 0.88     | 0.20     | 1.11     | 0.36     | 0.94     | 0.30     | 4.42     | 0.11     |          |                                          | TLR5      | TLR5            | Toll-like receptor 5                                                                                           | NM_003268 | Hs.114408 |  |  |  |  |
| BMP1R1B                                                    | 1.06     | 0.30     | 1.27     | 0.19     | 1.00     | 0.30     | 4.41     | 0.11     |          |                                          | BMP1R1B   | ALK-6           | Bone morphogenetic protein receptor, type IB                                                                   | NM_001203 | Hs.87223  |  |  |  |  |
| CCR1                                                       | 0.77     | 0.09     | 0.96     | 0.26     | 0.90     | 0.21     | 4.36     | 0.10     |          |                                          | CCR1      | MIP1aR          | Chemokine (C-C motif) receptor 1                                                                               | NM_001295 | Hs.301921 |  |  |  |  |
| TNF                                                        | 0.98     | 0.48     | 0.88     | 0.22     | 0.70     | 0.04     | 4.33     | 0.07     |          |                                          | TNF       | TNFA            | Tumor necrosis factor (TNF superfamily, member 2)                                                              | NM_000594 | Hs.241570 |  |  |  |  |
| IL12RB2                                                    | 0.89     | 0.14     | 1.04     | 0.40     | 1.13     | 0.38     | 4.32     | 0.13     |          |                                          | IL12RB2   | IL-12Rb2        | Interleukin 12 receptor, beta 2                                                                                | NM_001559 | Hs.413608 |  |  |  |  |
| NFATC1                                                     | 0.89     | 0.23     | 0.99     | 0.30     | 1.13     | 0.34     | 4.26     | 0.14     |          |                                          | NFATC1    | NFATc           | Nuclear factor of activated T-cells, cytoplasmic, calcineurin-dependent 1                                      | NM_172390 | Hs.96149  |  |  |  |  |
| NOS2A                                                      |          |          |          |          |          |          |          |          |          |                                          |           |                 |                                                                                                                |           |           |  |  |  |  |

|           |      |      |      |      |      |      |      |      |           |               |                                                                                                              |           |           |
|-----------|------|------|------|------|------|------|------|------|-----------|---------------|--------------------------------------------------------------------------------------------------------------|-----------|-----------|
| ACVR2B    | 0.93 | 0.31 | 1.20 | 0.26 | 1.19 | 0.34 | 4.03 | 0.10 | ACVR2B    | ACVR2B        | Activin A receptor, type IIB                                                                                 | NM_001106 | Hs.23994  |
| SLA       | 1.02 | 0.37 | 1.11 | 0.44 | 0.78 | 0.22 | 4.03 | 0.13 | SLA       | SLAP          | Src-like-adapter                                                                                             | NM_006748 | Hs.75367  |
| CXCL6     | 0.82 | 0.11 | 0.89 | 0.22 | 0.90 | 0.24 | 3.99 | 0.12 | CXCL6     | GCP-2/SCYB6   | Chemokine (C-X-C motif) ligand 6 (granulocyte chemotactic protein 2)                                         | NM_002993 | Hs.164021 |
| TDGF1     | 0.94 | 0.37 | 1.12 | 0.41 | 0.79 | 0.23 | 3.97 | 0.12 | TDGF1     | TDGF1         | Teratocarcinoma-derived growth factor 1                                                                      | NM_003212 | Hs.385870 |
| TRAF5     | 1.05 | 0.45 | 1.19 | 0.50 | 0.57 | 0.09 | 3.96 | 0.10 | TRAF5     | TRAF5         | TNF receptor-associated factor 5                                                                             | NM_004619 | Hs.385885 |
| TLR6      | 0.89 | 0.22 | 1.06 | 0.30 | 0.90 | 0.26 | 3.91 | 0.13 | TLR6      | TLR6          | Toll-like receptor 6                                                                                         | NM_006068 | Hs.366986 |
| CCR8      | 0.87 | 0.21 | 1.01 | 0.35 | 1.20 | 0.39 | 3.87 | 0.12 | CCR8      | CCR8          | Chemokine (C-C motif) receptor 8                                                                             | NM_005201 | Hs.113222 |
| MAPK10    | 1.13 | 0.09 | 1.02 | 0.35 | 1.00 | 0.30 | 3.84 | 0.10 | MAPK10    | JNK3          | Mitogen-activated protein kinase 10                                                                          | NM_002753 | Hs.25209  |
| TLR8      | 0.96 | 0.33 | 0.98 | 0.26 | 0.94 | 0.27 | 3.81 | 0.12 | TLR8      | TLR8          | Toll-like receptor 8                                                                                         | NM_016610 | Hs.272410 |
| TLR3      | 0.92 | 0.34 | 1.24 | 0.41 | 0.84 | 0.28 | 3.79 | 0.11 | TLR3      | TLR3          | Toll-like receptor 3                                                                                         | NM_003265 | Hs.29499  |
| MYF5      | 0.84 | 0.05 | 1.14 | 0.45 | 0.89 | 0.28 | 3.79 | 0.12 | MYF5      | MYF5          | Myogenic factor 5                                                                                            | NM_005593 | Hs.178023 |
| SELPLG    | 1.19 | 0.16 | 1.04 | 0.24 | 0.81 | 0.21 | 3.79 | 0.11 | SELPLG    | PSGL1         | Selectin P ligand                                                                                            | NM_003006 | Hs.423077 |
| CX3CR1    | 0.87 | 0.14 | 1.06 | 0.45 | 1.07 | 0.34 | 3.78 | 0.12 | CX3CR1    | CX3CR1        | Chemokine (C-X3-C motif) receptor 1                                                                          | NM_001337 | Hs.78913  |
| TLR10     | 0.90 | 0.03 | 1.05 | 0.29 | 0.79 | 0.28 | 3.77 | 0.09 | TLR10     | TLR10         | Toll-like receptor 10                                                                                        | NM_030956 | Hs.120551 |
| IL5RA     | 0.93 | 0.08 | 1.28 | 0.14 | 1.01 | 0.34 | 3.77 | 0.12 | IL5RA     | IL-5 Ra       | Interleukin 5 receptor, alpha                                                                                | NM_000564 | Hs.68876  |
| TRAF6     | 1.23 | 0.32 | 1.19 | 0.08 | 0.75 | 0.06 | 3.72 | 0.06 | TRAF6     | TRAF6         | TNF receptor-associated factor 6                                                                             | NM_004620 | Hs.444172 |
| REL       | 0.97 | 0.29 | 0.83 | 0.15 | 0.94 | 0.25 | 3.70 | 0.11 | REL       | c-Rel         | V-rel reticuloendotheliosis viral oncogene homolog (avian)                                                   | NM_002908 | Hs.44313  |
| NFKBIL2   | 0.95 | 0.36 | 0.97 | 0.27 | 0.80 | 0.21 | 3.70 | 0.11 | NFKBIL2   | IKBR          | Nuclear factor of kappa light polypeptide gene enhancer in B-cells inhibitor-like 2                          | NM_013432 | Hs.356764 |
| TNFSF4    | 0.87 | 0.29 | 1.10 | 0.32 | 0.80 | 0.21 | 3.66 | 0.12 | TNFSF4    | OX40L         | Tumor necrosis factor (ligand) superfamily, member 4 (tax-transcriptionally activated glycoprotein 1, 34kDa) | NM_003326 | Hs.181097 |
| SOCS4     | 0.98 | 0.44 | 0.97 | 0.29 | 1.11 | 0.45 | 3.64 | 0.11 | SOCS4     | SOCS4         | Suppressor of cytokine signaling 4                                                                           | NM_080867 | Hs.352327 |
| TFCP2     | 1.05 | 0.32 | 1.14 | 0.42 | 0.86 | 0.25 | 3.61 | 0.10 | TFCP2     | TFCP2         | Transcription factor CP2                                                                                     | NM_005653 | Hs.154970 |
| NUP214    | 0.95 | 0.25 | 1.00 | 0.28 | 1.08 | 0.32 | 3.60 | 0.13 | NUP214    | CAIN          | Nucleoporin 214kDa                                                                                           | NM_005085 | Hs.460294 |
| TNFSF5    | 0.87 | 0.22 | 1.15 | 0.37 | 0.87 | 0.27 | 3.58 | 0.11 | TNFSF5    | CD40L/CD154/1 | Tumor necrosis factor (ligand) superfamily, member 5 (hyper-IgM syndrome)                                    | NM_000074 | Hs.652    |
| PAK1      | 1.18 | 0.30 | 0.86 | 0.19 | 1.14 | 0.31 | 3.56 | 0.06 | PAK1      | Pak1          | P21/Cdc42/Rac1-activated kinase 1 (STE20 homolog, yeast)                                                     | NM_002576 | Hs.64056  |
| IVL       | 0.94 | 0.22 | 1.04 | 0.40 | 0.85 | 0.24 | 3.55 | 0.10 | IVL       | Involucrin    | Involucrin                                                                                                   | NM_005547 | Hs.157091 |
| IL19      | 1.16 | 0.11 | 1.43 | 0.21 | 1.13 | 0.35 | 3.55 | 0.08 | IL19      | IL19          | Interleukin 19                                                                                               | NM_013371 | Hs.71979  |
| NFAT5     | 1.00 | 0.36 | 0.97 | 0.32 | 1.17 | 0.34 | 3.52 | 0.11 | NFAT5     | TONEBP        | Nuclear factor of activated T-cells 5, tonicity-responsive                                                   | NM_006599 | Hs.86998  |
| MAP3K7IP1 | 1.01 | 0.41 | 1.03 | 0.34 | 0.88 | 0.22 | 3.52 | 0.09 | MAP3K7IP1 | TAB1          | Mitogen-activated protein kinase kinase kinase 7 interacting protein 1                                       | NM_006116 | Hs.403927 |
| ACVR1     | 1.10 | 0.27 | 1.13 | 0.32 | 0.90 | 0.23 | 3.50 | 0.11 | ACVR1     | ALK-2         | Activin A receptor, type I                                                                                   | NM_001105 | Hs.150402 |
| ITK       | 0.96 | 0.24 | 1.11 | 0.45 | 0.98 | 0.35 | 3.49 | 0.12 | ITK       | Itk           | IL2-inducible T-cell kinase                                                                                  | NM_005546 | Hs.211576 |
| IL11      | 0.97 | 0.31 | 0.93 | 0.22 | 0.78 | 0.25 | 3.42 | 0.06 | IL11      | IL-11         | Interleukin 11                                                                                               | NM_000641 | Hs.1721   |
| TNFRSF9   | 0.97 | 0.45 | 1.14 | 0.31 | 0.80 | 0.24 | 3.41 | 0.09 | TNFRSF9   | 4-1BB         | Tumor necrosis factor receptor superfamily, member 9                                                         | NM_001561 | Hs.528403 |
| VAV2      | 1.04 | 0.34 | 1.05 | 0.30 | 0.82 | 0.25 | 3.39 | 0.12 | VAV2      | Vav2          | Vav 2 oncogene                                                                                               | NM_003371 | Hs.4248   |
| TRAF2     | 0.99 | 0.46 | 0.94 | 0.22 | 0.77 | 0.13 | 3.31 | 0.09 | TRAF2     | TRAP3         | TNF receptor-associated factor 2                                                                             | NM_021138 | Hs.437575 |
| TLR4      | 0.95 | 0.37 | 1.16 | 0.44 | 0.91 | 0.34 | 3.24 | 0.11 | TLR4      | TLR4          | Toll-like receptor 4                                                                                         | NM_003266 | Hs.174312 |
| TLR2      | 0.90 | 0.29 | 1.18 | 0.37 | 0.80 | 0.24 | 2.98 | 0.11 | TLR2      | TLR2          | Toll-like receptor 2                                                                                         | NM_003264 | Hs.519033 |
| TRAF3     | 1.00 | 0.41 | 0.90 | 0.21 | 0.58 | 0.09 | 2.80 | 0.09 | TRAF3     | CRAF1         | TNF receptor-associated factor 3                                                                             | NM_003300 | Hs.297660 |
| SOCS2     | 0.92 | 0.14 | 1.04 | 0.34 | 0.87 | 0.22 | 2.78 | 0.14 | SOCS2     | STAT2         | Suppressor of cytokine signaling 2                                                                           | NM_003877 | Hs.405946 |
| TNFRSF1A  | 1.26 | 0.20 | 0.90 | 0.23 | 1.01 | 0.25 | 2.76 | 0.07 | TNFRSF1A  | TNFR1         | Tumor necrosis factor receptor superfamily, member 1A                                                        | NM_001065 | Hs.159    |
| SOCS6     | 0.94 | 0.11 | 0.96 | 0.32 | 1.00 | 0.26 | 2.61 | 0.12 | SOCS6     | SOCS4/CIS4    | Suppressor of cytokine signaling 6                                                                           | NM_004232 | Hs.44439  |
| MAP3K7    | 1.05 | 0.27 | 0.89 | 0.20 | 0.91 | 0.16 | 2.60 | 0.06 | MAP3K7    | TAK1          | Mitogen-activated protein kinase kinase kinase 7                                                             | NM_003188 | Hs.290346 |
| SAA1      | 1.00 | 0.36 | 0.88 | 0.14 | 1.12 | 0.29 | 2.57 | 0.07 | SAA1      | SAA1          | Serum amyloid A1                                                                                             | NM_000331 | Hs.332053 |
| VCAM1     | 0.96 | 0.34 | 1.01 | 0.33 | 0.81 | 0.24 | 2.53 | 0.12 | VCAM1     | VCAM-1        | Vascular cell adhesion molecule 1                                                                            | NM_001078 | Hs.109225 |
| MYD88     | 1.09 | 0.24 | 0.88 | 0.22 | 0.88 | 0.21 | 2.32 | 0.08 | MYD88     | MyD88         | Myeloid differentiation primary response gene (88)                                                           | NM_002468 | Hs.82116  |
| TGFB2     | 1.13 | 0.07 | 0.77 | 0.04 | 1.10 | 0.30 | 2.25 | 0.09 | TGFB2     | TGF b2        | Transforming growth factor, beta 2                                                                           | NM_003238 | Hs.169300 |
| TGFB1     | 1.14 | 0.03 | 0.75 | 0.08 | 0.93 | 0.16 | 2.04 | 0.10 | TGFB1     | TGFb1         | Transforming growth factor, beta 1 (Camurati-Engelmann disease)                                              | NM_000660 | Hs.1103   |
| FOSL1     | 1.28 | 0.16 | 0.97 | 0.44 | 0.88 | 0.24 | 1.92 | 0.06 | FOSL1     | Fra-1         | FOS-like antigen 1                                                                                           | NM_005438 | Hs.283565 |
