# Supplementary material
Source: PubMed Central journal article supplement (PMC3872785)
Supplement: NIHMS508443-supplement-Supp_table_2.pdf [file NIHMS508443-supplement-Supp_table_2.pdf]

| <b>Gene ontology for HuR targets identified in BEAS-2B cells after treatment with TNF<math>\alpha</math> plus IFN<math>\gamma</math> (50 ng/ml each, 18 hr)</b> |                  |                                                                                                         |           |                            |
|-----------------------------------------------------------------------------------------------------------------------------------------------------------------|------------------|---------------------------------------------------------------------------------------------------------|-----------|----------------------------|
| <i>Symbol</i>                                                                                                                                                   | <i>Gene Name</i> | <i>Description</i>                                                                                      |           | <b>classification</b>      |
| CCL2                                                                                                                                                            | MCP1/SCYA2       | Chemokine (C-C motif) ligand 2                                                                          |           | immunity                   |
| CXCL1                                                                                                                                                           | GROa/MGSA        | Chemokine (C-X-C motif) ligand 1 (melanoma growth stimulating activity, alpha)                          |           | immunity                   |
| CCL8                                                                                                                                                            | MCP-2            | Chemokine (C-C motif) ligand 8                                                                          |           | immunity                   |
| CXCL2                                                                                                                                                           | MIP-2a/GROb      | Chemokine (C-X-C motif) ligand 2                                                                        |           | immunity                   |
| TGFA                                                                                                                                                            | TGF-a            | Transforming growth factor, alpha                                                                       |           | immunity                   |
| TNFRSF1B                                                                                                                                                        | TNFR2/p75        | Tumor necrosis factor receptor superfamily, member 1B                                                   |           | Receptor                   |
| CCL20                                                                                                                                                           | MIP-3a/SCYA20    | Chemokine (C-C motif) ligand 20                                                                         |           | immunity                   |
| IL8                                                                                                                                                             | IL-8             | Interleukin 8                                                                                           |           | immunity                   |
| TNFSF11                                                                                                                                                         | TRANCE           | Tumor necrosis factor (ligand) superfamily, member 11                                                   |           | immunity                   |
| ITGB7                                                                                                                                                           | Integrin b7      | Integrin, beta 7                                                                                        |           | immunity                   |
| TNFRSF7                                                                                                                                                         | CD27             | Tumor necrosis factor receptor superfamily, member 7                                                    |           | Receptor                   |
| TGFBR1                                                                                                                                                          | ALK-5/ACVRLK4    | Transforming growth factor, beta receptor I (activin A receptor type II-like kinase, 53kDa)             |           | Receptor                   |
| IL6                                                                                                                                                             | IL-6             | Interleukin 6 (interferon, beta 2)                                                                      |           | immunity                   |
| TGFBR2                                                                                                                                                          | TGFbR2           | Transforming growth factor, beta receptor II (70/80kDa)                                                 |           | immunity                   |
| MAPK8                                                                                                                                                           | JNK1             | Mitogen-activated protein kinase 8                                                                      |           | signaling                  |
| SOCS3                                                                                                                                                           | SSI-3            | Suppressor of cytokine signaling 3                                                                      |           | signaling                  |
| TRPV6                                                                                                                                                           | ECAC2/Cat1       | Transient receptor potential cation channel, subfamily V, member 6                                      |           | Receptor                   |
| TYK2                                                                                                                                                            | Tyk2             | Tyrosine kinase 2                                                                                       |           | signaling                  |
| PPP3R1                                                                                                                                                          | CALNB1           | Protein phosphatase 3 (formerly 2B), regulatory subunit B, 19kDa, alpha isoform (calcineurin B, type I) |           | signaling                  |
| VAV1                                                                                                                                                            | Vav1             | Vav 1 oncogene                                                                                          |           | signaling                  |
| CSNK2A1                                                                                                                                                         | CK-II alpha      | Casein kinase 2, alpha 1 polypeptide                                                                    |           | signaling                  |
| TNFRSF21                                                                                                                                                        | TNFRSF21         | Tumor necrosis factor receptor superfamily, member 21                                                   |           | Receptor                   |
| MAP3K2                                                                                                                                                          | MEKK2            | Mitogen-activated protein kinase kinase kinase 2                                                        |           | signaling                  |
| TRAF1                                                                                                                                                           | TRAF1            | TNF receptor-associated factor 1                                                                        |           | signaling                  |
| CSNK2B                                                                                                                                                          | CK-II beta       | Casein kinase 2, beta polypeptide                                                                       |           | signaling                  |
| SMAD2                                                                                                                                                           | MADH2            | SMAD, mothers against DPP homolog 2 (Drosophila)                                                        |           | transcription              |
| RNF110                                                                                                                                                          | ZNF144           | Ring finger protein 110                                                                                 |           | transcription              |
| <b>Summary</b>                                                                                                                                                  |                  |                                                                                                         |           |                            |
| <b>Classification</b>                                                                                                                                           |                  |                                                                                                         | <b>n=</b> | <b>% total HuR Targets</b> |
| Defense/Immunity                                                                                                                                                |                  |                                                                                                         | 11        | 41                         |
| Signaling molecule                                                                                                                                              |                  |                                                                                                         | 9         | 33                         |
| Transcription factor                                                                                                                                            |                  |                                                                                                         | 2         | 7                          |
| Receptor                                                                                                                                                        |                  |                                                                                                         | 5         | 19                         |
|                                                                                                                                                                 | <b>total</b>     |                                                                                                         | <b>27</b> | <b>100</b>                 |
