# Supplementary material
Source: PubMed Central journal article supplement (PMC3872785)
Supplement: NIHMS508443-supplement-Supp_table_3_and_4.pdf [file NIHMS508443-supplement-Supp_table_3_and_4.pdf]

| UNIGENE_G8_ACC |       | Symbol of plate NMs 10-29-10 |           | GEMMA™ S series Human Autoimmune and Inflammatory Complete List of Genes | GEMMA™ S series Human Autoimmune and Inflammatory Response Gene Array (SuperArray Bioscience)                          | Genes with HuR motifs                                                                                                  | Description Gene name | Symbol of HuR hits 10-28-10 | GeneID | Score | No. of Motif | Motif Position                                                                                                                                                                                                                                                     |
|----------------|-------|------------------------------|-----------|--------------------------------------------------------------------------|------------------------------------------------------------------------------------------------------------------------|------------------------------------------------------------------------------------------------------------------------|-----------------------|-----------------------------|--------|-------|--------------|--------------------------------------------------------------------------------------------------------------------------------------------------------------------------------------------------------------------------------------------------------------------|
| 266            | 52865 | 121150                       | 15344     | OPN1                                                                     |                                                                                                                        |                                                                                                                        |                       |                             |        |       |              |                                                                                                                                                                                                                                                                    |
| 154            |       | 121150                       | 15344     | DKFZp451J0118                                                            |                                                                                                                        |                                                                                                                        |                       |                             |        |       |              |                                                                                                                                                                                                                                                                    |
| 238            | 366   | AF067420                     | MGC27165  | Hypothetical protein MGC27165                                            |                                                                                                                        |                                                                                                                        |                       |                             |        |       |              |                                                                                                                                                                                                                                                                    |
| 5              |       | 410104                       | NM_000020 | ACVRL1                                                                   |                                                                                                                        |                                                                                                                        |                       |                             |        |       |              |                                                                                                                                                                                                                                                                    |
| 6              |       | 19383                        | NM_000029 | ACT                                                                      | Angiotensinogen (serpin peptidase inhibitor, clade A, member 8)                                                        | Angiotensinogen (serpin peptidase inhibitor, clade A, member 8)                                                        | AGT                   |                             | 383    | 0.42  | 1            | 1865-1881(0.42)                                                                                                                                                                                                                                                    |
| 20             |       | 284394                       | NM_000064 | C1                                                                       |                                                                                                                        |                                                                                                                        |                       |                             |        |       |              |                                                                                                                                                                                                                                                                    |
| 59             |       | 2259                         | NM_000073 | CD3G                                                                     |                                                                                                                        |                                                                                                                        |                       |                             |        |       |              |                                                                                                                                                                                                                                                                    |
| 73             |       | 172928                       | NM_000088 | COL1A1                                                                   | Collagen, type I, alpha 1                                                                                              | Collagen, type I, alpha 1                                                                                              | COL1A1                |                             | 1277   | 0.42  | 3            | 4642-4658(0.42) 5493-5508(0.29) 5552-5568(0.01)                                                                                                                                                                                                                    |
| 74             |       | 232115                       | NM_000089 | COL1A2                                                                   | Collagen, type II, alpha 2                                                                                             | Collagen, type II, alpha 2                                                                                             | COL1A2                |                             | 1278   | 2.42  | 2            | 4848-4864(1.42) 5013-5029(0.42)                                                                                                                                                                                                                                    |
| 75             |       | 433625                       | NM_000090 | COL3A1                                                                   | Collagen, type III, alpha 1                                                                                            | Collagen, type III, alpha 1                                                                                            | COL3A1                |                             | 1281   | 2.42  | 2            | 5007-5023(0.01) 5099-5115(2.42)                                                                                                                                                                                                                                    |
| 102            |       | 76753                        | NM_000118 | ENG                                                                      | Endoglin (Osler-Rendu-Weber syndrome 1) Endoglin                                                                       |                                                                                                                        |                       |                             |        |       |              |                                                                                                                                                                                                                                                                    |
| 127            |       | 386467                       | NM_000201 | ICAM1                                                                    | Intercellular adhesion molecule 1                                                                                      | Intercellular adhesion molecule 1                                                                                      | ICAM1                 |                             | 3383   | 0.42  | 3            | 1915-1930(0.29) 2735-2750(0.12) 2892-2908(0.42)                                                                                                                                                                                                                    |
| 174            |       | 84                           | NM_000206 | IL2RG                                                                    |                                                                                                                        |                                                                                                                        |                       |                             |        |       |              |                                                                                                                                                                                                                                                                    |
| 198            |       | 210287                       | NM_000215 | IL4I3                                                                    |                                                                                                                        |                                                                                                                        |                       |                             |        |       |              |                                                                                                                                                                                                                                                                    |
| 207            |       | 194230                       | NM_000230 | LEP                                                                      | Leptin (obesity homolog, mouse) Leptin                                                                                 | Leptin                                                                                                                 | LEP                   |                             | 3952   | 0.42  | 3            | 1518-1534(0.42) 3054-3070(0.42) 3379-3395(0.42)                                                                                                                                                                                                                    |
| 239            |       | 126714                       | NM_000246 | MHC2TA                                                                   | Class II, major histocompatibility complex, transactivator                                                             | Class II, major histocompatibility complex, transactivator                                                             | CIITA                 |                             | 4261   | 0.42  | 2            | 4600-4616(0.42) 5487-5503(0.42)                                                                                                                                                                                                                                    |
| 285            |       | 105656                       | NM_000311 | SCYE1                                                                    |                                                                                                                        |                                                                                                                        |                       |                             |        |       |              |                                                                                                                                                                                                                                                                    |
| 315            |       | 28005                        | NM_000358 | TGFB1                                                                    | Transforming growth factor, beta-induced, 88Da                                                                         | Transforming growth factor, beta-induced, 88Da                                                                         | TGFB1                 |                             | 7045   | 0.83  | 2            | 2662-6780(0.83) 2536-2550(0.42)                                                                                                                                                                                                                                    |
| 65             |       | 370771                       | NM_000389 | CDKN1A                                                                   | Cyclin-dependent kinase inhibitor 1A (p21, Cip1)                                                                       | Cyclin-dependent kinase inhibitor 1A (p21, Cip1)                                                                       | CDKN1A                |                             | 1026   | 1.42  | 2            | 1038-1050(1.42) 2109-2125(0.42)                                                                                                                                                                                                                                    |
| 98             |       | 1395                         | NM_000399 | EGR2                                                                     | Early growth response 2                                                                                                | Early growth response 2                                                                                                | EGR2                  |                             | 1999   | 1     | 4            | 4137-1530(0.83) 2436-2452(1.00) 2748-2764(0.83) 2766-2781(0.29)                                                                                                                                                                                                    |
| 172            |       | 130058                       | NM_000417 | IL2RA                                                                    | Interleukin 2 receptor, alpha                                                                                          | Interleukin 2 receptor, alpha                                                                                          | IL2RA                 |                             | 3559   | 1.01  | 1            | 1347-3631(0.01)                                                                                                                                                                                                                                                    |
| 177            |       | 75545                        | NM_000418 | IL4R                                                                     |                                                                                                                        |                                                                                                                        |                       |                             |        |       |              |                                                                                                                                                                                                                                                                    |
| 288            |       | 83848                        | NM_000450 | SELL                                                                     | Selectin L                                                                                                             | Selectin L                                                                                                             | SELL                  |                             | 6402   | 3.42  | 4            | 2251-2267(0.83) 2764-2780(3.42) 3643-3658(0.29) 3722-3738(0.42)                                                                                                                                                                                                    |
| 7              |       | 112432                       | NM_000479 | AMH                                                                      | Anti-Müllerian hormone                                                                                                 |                                                                                                                        |                       |                             |        |       |              |                                                                                                                                                                                                                                                                    |
| 179            |       | 68876                        | NM_000564 | IL5RA                                                                    |                                                                                                                        |                                                                                                                        |                       |                             |        |       |              |                                                                                                                                                                                                                                                                    |
| 181            |       | 193400                       | NM_000565 | IL6R                                                                     | Interleukin 6 receptor                                                                                                 | Interleukin 6 receptor                                                                                                 | IL6R                  |                             | 3570   | 5     | 2            | 1167-1183(1.42) 2871-2887(5.00)                                                                                                                                                                                                                                    |
| 108            |       | 372979                       | NM_000569 | FCGR3A                                                                   | Fc fragment of IgG, low affinity IIIa, receptor (CD16a)                                                                | Fc fragment of IgG, low affinity IIIa, receptor (CD16a)                                                                | FCGR3A                |                             | 2214   | 0.42  | 1            | 2022-2038(0.42)                                                                                                                                                                                                                                                    |
| 142            |       | 193717                       | NM_000572 | IL10                                                                     | Interleukin 10                                                                                                         | Interleukin 10                                                                                                         | IL10                  |                             | 3586   | 0.71  | 3            | 815-831(0.42) 1171-1186(0.71) 1609-1625(0.01)                                                                                                                                                                                                                      |
| 164            |       | 1722                         | NM_000575 | IL1A                                                                     | Interleukin 1, alpha                                                                                                   | Interleukin 1, alpha                                                                                                   | IL1A                  |                             | 3552   | 1     | 2            | 1324-1340(1.00) 2400-2415(0.29)                                                                                                                                                                                                                                    |
| 165            |       | 126256                       | NM_000576 | IL1B                                                                     |                                                                                                                        |                                                                                                                        |                       |                             |        |       |              |                                                                                                                                                                                                                                                                    |
| 52             |       | 54443                        | NM_000579 | CCRS                                                                     | Chemokine (C-C motif) receptor 5                                                                                       | Chemokine (C-C motif) receptor 5                                                                                       | CCRS                  |                             | 1234   | 1.55  | 3            | 1835-1850(0.29) 3145-3161(0.42) 3583-3598(1.55)                                                                                                                                                                                                                    |
| 148            |       | 654                          | NM_000584 | IL8                                                                      | Interleukin 8                                                                                                          | Interleukin 8                                                                                                          | IL8                   |                             | 3576   | 3.42  | 2            | 238-250(0.01) 1149-1165(3.42) CXCL8 IL-8                                                                                                                                                                                                                           |
| 158            |       | 89529                        | NM_000586 | IL2                                                                      | Interleukin 2                                                                                                          | Interleukin 2                                                                                                          | IL2                   |                             | 3558   | 3.42  | 4            | 4159-175(0.42) 432-448(0.42) 816-832(1.42) 952-968(0.42)                                                                                                                                                                                                           |
| 175            |       | 694                          | NM_000588 | IL3                                                                      | Interleukin 3 (colony-stimulating factor, multiple) IL-3                                                               | Interleukin 3 (colony-stimulating factor, multiple) IL-3                                                               | IL3                   |                             |        |       |              |                                                                                                                                                                                                                                                                    |
| 176            |       | 73917                        | NM_000589 | IL4                                                                      | Interleukin 4                                                                                                          | Interleukin 4                                                                                                          | IL4                   |                             | 3565   | 0.42  | 1            | 191-107(0.42) human IL-4                                                                                                                                                                                                                                           |
| 187            |       | 960                          | NM_000590 | IL9                                                                      | Interleukin 9                                                                                                          | Interleukin 9                                                                                                          | IL9                   |                             | 3578   | 0.88  | 3            | 275-291(0.42) 451-467(0.42) 575-590(0.88)                                                                                                                                                                                                                          |
| 311            |       | 211600                       | NM_000594 | TNFAIP1                                                                  | Tumor necrosis factor, alpha-induced protein 3                                                                         | Tumor necrosis factor (TNF superfamily, member 2)                                                                      | TNFAIP1               |                             | 7124   | 2.42  | 4            | 11331-1347(2.42)                                                                                                                                                                                                                                                   |
| 208            |       | 36                           | NM_000595 | LTA                                                                      | Lymphotxin alpha (TNF superfamily, member 1)                                                                           | Lymphotxin alpha (TNF superfamily, member 1)                                                                           | TNF                   |                             |        |       |              |                                                                                                                                                                                                                                                                    |
| 137            |       | 450230                       | NM_000598 | IGFBP3                                                                   | Insulin-like growth factor binding protein 3                                                                           | Insulin-like growth factor binding protein 3                                                                           | IGFBP3                |                             | 3486   | 2.42  | 4            | 1075-1091(0.01) 1131-1147(0.42) 1846-1862(0.42) 2414-2430(2.42)                                                                                                                                                                                                    |
| 180            |       | 512234                       | NM_000600 | IL6                                                                      | Interleukin 6 (interferon, beta 2)                                                                                     | Interleukin 6 (interferon, beta 2)                                                                                     | IL6                   |                             | 3569   | 4     | 4            | 4825-841(0.83) 879-895(4.00) 968-984(0.42) 1072-1088(3.00) 1670-1686(0.42) 1935-1951(0.42) 2121-2137(0.42) 2762-2777(0.29) 2803-2819(0.01) SERPINE1 serine (or cysteine) protease inhibitor, clade E 5 (heparin, plasminogen activator inhibitor type 1), member 1 |
| 291            |       | 184510                       | NM_000602 | SFN                                                                      | Serpin Stratifin                                                                                                       | Serpin peptidase inhibitor, clade E (nexin, plasminogen activator inhibitor type 1), member 1                          | SERPINE1              |                             | 5054   | 0.42  | 5            | 1081-1097(0.42) 1513-1529(0.42) 2010-2026(0.42) 2051-2067(0.25) 3243-3259(0.42)                                                                                                                                                                                    |
| 257            |       | 278388                       | NM_000607 | ORM2                                                                     |                                                                                                                        |                                                                                                                        |                       |                             |        |       |              |                                                                                                                                                                                                                                                                    |
| 268            |       | 528636                       | NM_000608 | P2RX7                                                                    |                                                                                                                        |                                                                                                                        |                       |                             |        |       |              |                                                                                                                                                                                                                                                                    |
| 89             |       | 436042                       | NM_000609 | CXCL12                                                                   | Chemokine (C-X-C motif) ligand 12 (stromal cell-derived factor 1)                                                      | Chemokine (C-X-C motif) ligand 12 (stromal cell-derived factor 1)                                                      | CXCL12                |                             | 6387   | 0.42  | 5            | 1081-1097(0.42) 1513-1529(0.42) 2010-2026(0.42) 2051-2067(0.25) 3243-3259(0.42)                                                                                                                                                                                    |
| 246            |       | 78792                        | NM_000615 | NCAM1                                                                    |                                                                                                                        |                                                                                                                        |                       |                             |        |       |              |                                                                                                                                                                                                                                                                    |
| 136            |       | 308053                       | NM_000618 | IGF1                                                                     | Insulin-like growth factor 1 (somatomedin C)                                                                           | Insulin-like growth factor 1 (somatomedin C)                                                                           | IGF1                  |                             | 3479   | 3.42  | 12           | 2218-2234(1.42) 2687-2703(0.42) 2833-2849(0.83) 3556-3571(0.71) 3863-3879(1.42) 4094-4509(0.71) 5006-5022(0.42) 5174-5190(1.00) 5932-5948(0.83) 6662-6678(0.42) 7069-7085(3.42) 7152-7168(1.42)                                                                    |
| 135            |       | 856                          | NM_000619 | IFNG                                                                     | Interferon, gamma                                                                                                      | Interferon, gamma                                                                                                      | IFNG                  |                             | 3458   | 0.83  | 3            | 631-647(0.42) 673-689(0.83) 730-746(0.83) human IFNg                                                                                                                                                                                                               |
| 262            |       | 193788                       | NM_000625 | NOS2A                                                                    | Nitric oxide synthase 2, inducible                                                                                     | Nitric oxide synthase 2, inducible                                                                                     | NOS2                  |                             | 4843   | 0.42  | 1            | 1277-2930(0.42)                                                                                                                                                                                                                                                    |
| 144            |       | 418291                       | NM_000628 | IL10RB                                                                   | Interleukin 10 receptor, beta                                                                                          | Interleukin 10 receptor, beta                                                                                          | IL10RB                |                             | 3588   | 2.42  | 2            | 2132-1338(2.42) 1864-1890(1.42) 606-82(0.83) 963-979(0.42) 1456-1472(0.25) 1545-1560(0.29) 2248-2264(0.42) 2401-2417(1.42) 2831-2847(0.01) 3216-3232(0.01) 3257-3273(0.42) 3706-3722(0.25) 4184-4200(3.42) 5047-5063(0.01) 5114-5130(1.42) 5937-5953(0.42)         |
| 13             |       | 79241                        | NM_000633 | BLCL2                                                                    | B-cell CLL/lymphoma 2                                                                                                  | B-cell CLL/lymphoma 2                                                                                                  | BLCL2                 |                             | 596    | 3.42  | 14           |                                                                                                                                                                                                                                                                    |
| 185            |       | 194778                       | NM_000634 | IL9RA                                                                    | Chemokine (C-X-C motif) receptor 1                                                                                     | Chemokine (C-X-C motif) receptor 1                                                                                     | CXCR1                 |                             | 3577   | 1.01  | 1            | 1415-1431(1.01)                                                                                                                                                                                                                                                    |
| 343            |       | 8982                         | NM_000639 | FASLG                                                                    | Fas ligand (TNF superfamily, member 6)                                                                                 | Fas ligand (TNF superfamily, member 6)                                                                                 | FASLG                 |                             | 356    | 2.42  | 3            | 3927-3930(0.01) 1790-1805(0.29) 1812-1828(2.42)                                                                                                                                                                                                                    |
| 153            |       | 336046                       | NM_000640 | IL13RA2                                                                  | Interleukin 13 receptor, alpha 2                                                                                       | Interleukin 13 receptor, alpha 2                                                                                       | IL13RA2               |                             | 3598   | 2.42  | 2            | 2142-158(2.42) 1060-1076(2.42)                                                                                                                                                                                                                                     |
| 145            |       | 1721                         | NM_000641 | IL11                                                                     | Interleukin 11                                                                                                         | Interleukin 11                                                                                                         | IL11                  |                             | 3589   | 0.42  | 2            | 1555-1571(0.42) 2243-2258(0.12)                                                                                                                                                                                                                                    |
| 49             |       | 511794                       | NM_000648 | CCR2                                                                     | Data not found                                                                                                         |                                                                                                                        |                       |                             |        |       |              |                                                                                                                                                                                                                                                                    |
| 289            |       | 423077                       | NM_000655 | SELL                                                                     | Selectin L                                                                                                             | Selectin L                                                                                                             | SELL                  |                             | 6402   | 2     | 3            | 1741-1757(0.25) 1914-1930(0.42) 1957-1973(2.00)                                                                                                                                                                                                                    |
| 311            |       | 25511                        | NM_000660 | TGFB1                                                                    | Transforming growth factor beta 1 induced transcript 1                                                                 |                                                                                                                        |                       |                             |        |       |              |                                                                                                                                                                                                                                                                    |
| 58             |       | 3003                         | NM_000733 | CD3E                                                                     |                                                                                                                        |                                                                                                                        |                       |                             |        |       |              |                                                                                                                                                                                                                                                                    |
| 60             |       | 97087                        | NM_000734 | CD3Z                                                                     |                                                                                                                        |                                                                                                                        |                       |                             |        |       |              |                                                                                                                                                                                                                                                                    |
| 78             |       | 173894                       | NM_000757 | CSF1                                                                     | Colony stimulating factor 2 (granulocyte-macrophage)                                                                   | Colony stimulating factor 2 (granulocyte-macrophage)                                                                   | CSF2                  |                             | 1437   | 0.42  | 1            | 1713-2290(0.42)                                                                                                                                                                                                                                                    |
| 79             |       | 1340                         | NM_000758 | CSF2                                                                     | Colony stimulating factor 3 (granulocyte)                                                                              | Colony stimulating factor 3 (granulocyte)                                                                              | CSF3                  |                             | 1440   | 0.29  | 1            | 1700-715(0.29)                                                                                                                                                                                                                                                     |
| 80             |       | 2233                         | NM_000759 | CSF3                                                                     |                                                                                                                        |                                                                                                                        |                       |                             |        |       |              |                                                                                                                                                                                                                                                                    |
| 128            |       | 433303                       | NM_000873 | ICAM2                                                                    |                                                                                                                        |                                                                                                                        |                       |                             |        |       |              |                                                                                                                                                                                                                                                                    |
| 166            |       | 82112                        | NM_000877 | IL1R1                                                                    | Interleukin 1 receptor, type I                                                                                         | Interleukin 1 receptor, type I                                                                                         | IL1R1                 |                             | 3554   | 2     | 5            | 3161-3770(0.42) 720-736(0.42) 985-1001(1.42) 1339-1355(2.00) 3953-3969(0.42)                                                                                                                                                                                       |
| 173            |       | 75596                        | NM_000878 | IL2RB                                                                    | Interleukin 2 receptor, beta                                                                                           | Interleukin 2 receptor, beta                                                                                           | IL2RB                 |                             | 3560   | 1.01  | 2            | 2356-3572(1.00) 3905-3921(1.01)                                                                                                                                                                                                                                    |
| 178            |       | 2247                         | NM_000879 | IL5                                                                      | Interleukin 5 (colony-stimulating factor, eosinophil)                                                                  | Interleukin 5 (colony-stimulating factor, eosinophil)                                                                  | IL5                   |                             | 3567   | 1.29  | 2            | 2723-2790(2.5) 776-793(1.29)                                                                                                                                                                                                                                       |
| 183            |       | 72927                        | NM_000880 | IL7                                                                      | Interleukin 7                                                                                                          | Interleukin 7                                                                                                          | IL7                   |                             | 3574   | 0.42  | 2            | 791-805(0.01) 1099-1115(0.42)                                                                                                                                                                                                                                      |
| 147            |       | 673                          | NM_000882 | IL12A                                                                    | Interleukin 12A (natural killer cell stimulatory factor 1, cytotoxic lymphocyte maturation factor 1, integrin, beta 7) | Interleukin 12A (natural killer cell stimulatory factor 1, cytotoxic lymphocyte maturation factor 1, integrin, beta 7) | IL12A                 |                             | 3592   | 0.84  | 3            | 1134-1150(0.42) 1350-1368(0.83) 1387-1403(0.84)                                                                                                                                                                                                                    |
| 193            |       | 1741                         | NM_000889 | ITGB7                                                                    | Integrin, beta 7                                                                                                       | Integrin, beta 7                                                                                                       | ITGB7                 |                             | 3695   | 1.83  | 1            | 1246-2262(1.83)                                                                                                                                                                                                                                                    |
| 265            |       | 372                          | NM_000911 | OPRD1                                                                    | Opioid receptor, delta 1                                                                                               |                                                                                                                        |                       |                             |        |       |              |                                                                                                                                                                                                                                                                    |
| 276            |       | 444324                       | NM_000945 | PTPRC                                                                    | Protein phosphatase 3 (former 2B), regulatory subunit B, alpha isoform                                                 |                                                                                                                        |                       |                             |        |       |              |                                                                                                                                                                                                                                                                    |
| 335            |       | 159651                       | NM_010166 | TNFRSF21                                                                 |                                                                                                                        |                                                                                                                        |                       |                             |        |       |              |                                                                                                                                                                                                                                                                    |
| 357            |       | 73793                        | NM_010178 | VEGF                                                                     | Vascular cell adhesion molecule 1                                                                                      | Vascular cell adhesion molecule 1                                                                                      | VCAM1                 |                             | 7412   | 1.42  | 5            | 5449-465(0.42) 1031-1047(0.42) 2843-2858(0.88) 3038-3055(0.29) 3064-3080(1.42)                                                                                                                                                                                     |
| 1              |       | 150402                       | NM_010105 | ACVR1                                                                    | Activin A receptor, type I                                                                                             | Activin A receptor, type I                                                                                             | ACVR1                 |                             | 90     | 3     | 5            | 1516-1532(0.42) 1869-1885(0.83) 2566-2582(0.25) 2656-2672(3.00) 2820-2830(2.42)                                                                                                                                                                                    |
| 4              |       | 23984                        | NM_010106 | ACVR2B                                                                   |                                                                                                                        |                                                                                                                        |                       |                             |        |       |              |                                                                                                                                                                                                                                                                    |
| 18             |       | 87223                        | NM_010203 | BMPR1B                                                                   |                                                                                                                        |                                                                                                                        |                       |                             |        |       |              |                                                                                                                                                                                                                                                                    |
| 19             |       | 53250                        | NM_010204 | BMPR2                                                                    | Bone morphogenetic protein receptor, type II (serine/threonine kinase)                                                 | Bone morphogenetic protein receptor, type II (serine/threonine kinase)                                                 | BMPR2                 |                             | 659    | 3.42  | 1            | 13546-3562(3.42)                                                                                                                                                                                                                                                   |
| 25             |       | 312572                       | NM_010220 | CAMK2B                                                                   | Calcium/calmodulin-dependent protein kinase II beta                                                                    | Calcium/calmodulin-dependent protein kinase II beta                                                                    | CAMK2B                |                             | 816    | 0.42  | 1            | 12341-2357(0.42)                                                                                                                                                                                                                                                   |
| 337            |       | 1314                         | NM_010242 | CD27                                                                     | CD27 molecule                                                                                                          |                                                                                                                        |                       |                             |        |       |              |                                                                                                                                                                                                                                                                    |
| 338            |       | 528403                       | NM_010243 | TNFRSF9                                                                  | Tumor necrosis factor receptor superfamily, member 9                                                                   | Tumor necrosis factor receptor superfamily, member 9                                                                   | TNFRSF9               |                             | 919    | 5     | 2            | 1789-805(5.00)                                                                                                                                                                                                                                                     |
| 70             |       | 188998                       | NM_010278 | CHUK                                                                     | Conserved helix-loop-helix ubiquitous kinase                                                                           | Conserved helix-loop-helix ubiquitous kinase                                                                           | CHUK                  |                             | 1147   | 2     | 9            | 888-904(0.01) 1246-1262(0.01) 1313-1328(0.29) 2386-2402(0.42) 2999-3015(0.01) 3049-306                                                                                                                                                                             |

|     |        |           |                                                               |                                                                                                      |         |      |      |                                                                                                                                                                                                                                                                 |
|-----|--------|-----------|---------------------------------------------------------------|------------------------------------------------------------------------------------------------------|---------|------|------|-----------------------------------------------------------------------------------------------------------------------------------------------------------------------------------------------------------------------------------------------------------------|
| 150 | 413608 | NM_001559 | IL12RB2 Interleukin 12 receptor, beta 2 IL-12rb2              | Interleukin 12 receptor, beta 2                                                                      | IL12RB2 | 3595 | 1.42 | 3 2484-2500(1.42) 3390-3405(0.29) 3774-3790(0.83)                                                                                                                                                                                                               |
| 152 | 285115 | NM_001560 | IL13RA1 Interleukin 13 receptor, alpha 1                      | Interleukin 13 receptor, alpha 1                                                                     | IL13RA1 | 3597 | 1    | 4 1332-1348(0.42) 1770-1786(0.42) 3596-3612(1.00) 3878-3894(0.42)                                                                                                                                                                                               |
| 159 | 33373  | NM_001561 | TNFSF11 Tumor necrosis factor (ligand) superfamily, member 11 |                                                                                                      |         |      |      |                                                                                                                                                                                                                                                                 |
| 160 | 83077  | NM_001562 | IL18                                                          | Interleukin 18 (Interferon-gamma-inducing factor)                                                    | IL18    | 3606 | 1.25 | 2 728-744(1.25) 766-782(0.01)                                                                                                                                                                                                                                   |
| 87  | 413924 | NM_001565 | CXCL10                                                        |                                                                                                      |         |      |      |                                                                                                                                                                                                                                                                 |
| 189 | 182018 | NM_001569 | IRAK1                                                         |                                                                                                      |         |      |      |                                                                                                                                                                                                                                                                 |
| 190 | 424542 | NM_001570 | IRAK2                                                         |                                                                                                      |         |      |      |                                                                                                                                                                                                                                                                 |
| 31  | 389844 | NM_001574 | ACVR2                                                         | Activin A receptor, type IIA                                                                         | ACVR2A  | 92   | 2    | 5 456-472(0.42) 631-645(0.42) 1780-1796(1.01) 2122-2138(2.00) 2168-2184(0.42)                                                                                                                                                                                   |
| 15  | 69771  | NM_001710 | CFB                                                           | Complement factor B                                                                                  | CFB     | 629  | 0.83 | 1 1439-1455(0.83)                                                                                                                                                                                                                                               |
| 16  | 113916 | NM_001716 | BLR1                                                          | Chemokine (C-X-C motif) receptor 5                                                                   | CXCR5   | 643  | 3    | 1 2682-2698(0.00)                                                                                                                                                                                                                                               |
| 23  | 425808 | NM_001743 | CALM2                                                         | Calmodulin 2 (phosphorylase kinase, delta)                                                           | CALM2   | 805  | 0.42 | 1 1090-1106(0.42)                                                                                                                                                                                                                                               |
| 26  | 440638 | NM_001744 | CAMK4                                                         | Calcium/calmodulin-dependent protein kinase IV                                                       | CAMK4   | 814  | 0.83 | 3 411-427(0.25) 933-948(0.42) 1827-1843(0.83)                                                                                                                                                                                                                   |
| 283 | 122116 | NM_001754 | RUNK2                                                         | Runt-related transcription factor 1                                                                  | RUNK1   | 861  | 1.42 | 13 5080(0.42) 5149-5164(0.71) 5236-5252(0.42) 5297-5313(1.42) 5413-5429(0.42)                                                                                                                                                                                   |
| 61  | 82401  | NM_001781 | CD69                                                          | CD69 molecule                                                                                        | CD69    | 969  | 2.42 | 6 377-389(0.42) 649-665(0.42) 964-979(0.29) 1011-1027(2.42) 1126-1142(0.42) 1511-1527(7.42)                                                                                                                                                                     |
| 64  | 1634   | NM_001789 | CDC25A                                                        |                                                                                                      |         |      |      |                                                                                                                                                                                                                                                                 |
| 59  | 505100 | NM_001837 | CCR3                                                          |                                                                                                      |         |      |      |                                                                                                                                                                                                                                                                 |
| 54  | 1652   | NM_001838 | CCR7                                                          |                                                                                                      |         |      |      |                                                                                                                                                                                                                                                                 |
| 72  | 75110  | NM_001840 | CNR1                                                          |                                                                                                      |         |      |      |                                                                                                                                                                                                                                                                 |
| 11  | 80285  | NM_001880 | ATF2                                                          | Activating transcription factor 2                                                                    | ATF2    | 1386 | 1.39 | 6 269-285(0.42) 918-934(0.42) 1876-1894(1.39) 1902-1917(0.29) 1945-1960(1.13) 2044-2059(1.29)                                                                                                                                                                   |
| 81  | 446484 | NM_001895 | CSNK2A1 Casein kinase 2, alpha 1 polypeptide                  | Casein kinase 2, alpha 1 polypeptide                                                                 | CSNK2A1 | 1457 | 1.42 | 3 922-937(0.29) 1710-1726(0.42) 2170-2186(1.42)                                                                                                                                                                                                                 |
| 97  | 326035 | NM_001894 | EGR1                                                          |                                                                                                      |         |      |      |                                                                                                                                                                                                                                                                 |
| 106 | 897    | NM_002001 | FCER1A                                                        | Fc fragment of IgE, high affinity I, receptor for, alpha polypeptide                                 | FCER1A  | 2205 | 1    | 2 896-912(0.01) 1020-1036(1.00) Fc epsilon R alpha chain                                                                                                                                                                                                        |
| 107 | 1416   | NM_002002 | FCER2                                                         |                                                                                                      |         |      |      |                                                                                                                                                                                                                                                                 |
| 109 | 284244 | NM_002006 | FGF2                                                          | Fibroblast growth factor 2 (basic)                                                                   | FGF2    | 2347 | 5    | 1530-1546(0.42) 2214-2226(0.29) 2257-2272(0.88) 2376-2390(1.42) 3190-3206(5.00) 3316-3332(1.43) 3718-3735(0.42) 3761-3777(0.42) 4332-4348(0.01) 4457-4473(0.42) 4732-4738(1.42) 4820-4836(0.42) 5746-5759(0.29) 6061-6077(1.00) 6311-6327(0.42) 6506-6522(1.00) |
| 116 | 169946 | NM_002051 | GATA3                                                         | GATA binding protein 3                                                                               | GATA3   | 2625 | 0.8  | 2 291-305(0.42) 2151-2169(0.83) 2313-2327(0.01) GATA-3 Transcript Variant 2 also GC NRO bud/dmsa score -1.2                                                                                                                                                     |
| 117 | 243987 | NM_002052 | GATA4                                                         | GATA binding protein 4                                                                               | GATA4   | 2626 | 1.25 | 4 344-360(0.42) 369-385(1.25) 3045-3061(0.01) 3303-3317(0.01)                                                                                                                                                                                                   |
| 91  | 75765  | NM_002089 | CXCL2                                                         | Chemokine (C-X-C motif) ligand 2                                                                     | CXCL2   | 2920 | 1.42 | 4 589-605(1.42) 693-709(1.42) 885-901(0.25) 1008-1024(0.42)                                                                                                                                                                                                     |
| 92  | 89690  | NM_002090 | CXCL3                                                         | Chemokine (C-X-C motif) ligand 3                                                                     | CXCL3   | 2921 | 1    | 2 584-600(0.42) 665-681(1.00)                                                                                                                                                                                                                                   |
| 124 | 28235  | NM_002093 | CSK3B                                                         | Cytogen synthase kinase 3 beta                                                                       | CSK3B   | 2932 | 0.83 | 3 62-77(0.29) 432-448(0.83) 1282-1297(0.29)                                                                                                                                                                                                                     |
| 129 | 353214 | NM_002162 | ICAM3                                                         |                                                                                                      |         |      |      |                                                                                                                                                                                                                                                                 |
| 134 | 93177  | NM_002176 | IFNB1                                                         | Interferon, beta 1, fibroblast                                                                       | IFNB1   | 3456 | 1.42 | 2 683-699(1.42) 721-737(1.42)                                                                                                                                                                                                                                   |
| 182 | 71968  | NM_002184 | L6ST                                                          | Interleukin 6 signal transducer (gp130, oncostatin M receptor)                                       | L6ST    | 3572 | 1    | 3 227-243(0.83) 432-448(1.00) 1372-1388(0.42)                                                                                                                                                                                                                   |
| 186 | 406205 | NM_002186 | IL6R                                                          |                                                                                                      |         |      |      |                                                                                                                                                                                                                                                                 |
| 148 | 674    | NM_002187 | IL12B                                                         | Interleukin 12b (natural killer cell stimulatory factor 2, cytotoxic lymphocyte maturation factor 2) | IL12B   | 3593 | 1.42 | 3 496-512(1.42) 1291-1306(0.29) 2221-2237(0.01)                                                                                                                                                                                                                 |
| 151 | 845    | NM_002188 | IL13                                                          | Interleukin 13                                                                                       | IL13    | 3596 | 0.83 | 2 1130-1146(0.83) 1236-1252(0.42) IL-13                                                                                                                                                                                                                         |
| 156 | 12503  | NM_002189 | IL15RA                                                        | Interleukin 15 receptor, alpha                                                                       | IL15RA  | 3601 | 1.42 | 2 1534-1550(1.42) 1590-1606(0.42)                                                                                                                                                                                                                               |
| 158 | 41724  | NM_002190 | IL17                                                          | Interleukin 17A                                                                                      | IL17A   | 3605 | 1.42 | 3 766-782(0.42) 877-893(1.42) 1266-1282(1.42)                                                                                                                                                                                                                   |
| 191 | 8045   | NM_002198 | ITGB1                                                         |                                                                                                      |         |      |      |                                                                                                                                                                                                                                                                 |
| 192 | 149846 | NM_002213 | ITGB5                                                         | Integrin, beta 5                                                                                     | ITGB5   | 3693 | 0.83 | 3 2553-2569(0.83) 3121-3137(0.42) 3225-3240(0.29)                                                                                                                                                                                                               |
| 196 | 436004 | NM_002227 | JAK1                                                          | Janus kinase 1                                                                                       | JAK1    | 3716 | 1.42 | 2 146-161(0.71) 933-949(1.42)                                                                                                                                                                                                                                   |
| 199 | 78465  | NM_002228 | JUN                                                           | Jun oncogene                                                                                         | JUN     | 3725 | 2.42 | 3 2348-2364(2.42) 2481-2496(1.29) 2502-2516(1.01)                                                                                                                                                                                                               |
| 200 | 25292  | NM_002229 | JUNB                                                          | Jun B proto-oncogene                                                                                 | JUNB    | 3726 | 0.42 | 2 1534-1550(0.42) 1777-1793(0.42)                                                                                                                                                                                                                               |
| 203 | 182971 | NM_002249 | KPNAS                                                         | Karyopherin alpha 5 (importin alpha 6)                                                               | KPNAS   | 3841 | 0.42 | 1 1138-1340(0.42)                                                                                                                                                                                                                                               |
| 204 | 113503 | NM_002271 | KPNB3                                                         | Importin 5                                                                                           | IPOS    | 3843 | 5    | 5 589-605(5.00) 2428-2444(0.42) 3773-3789(0.42) 3869-3885(0.83) 3901-3917(1.42) 4724-4740(2.00) 5114-5130(0.01) 5134-5150(0.01) 5684-5700(2.00)                                                                                                                 |
| 205 | 409521 | NM_002286 | IAC3                                                          |                                                                                                      |         |      |      |                                                                                                                                                                                                                                                                 |
| 209 | 376208 | NM_002341 | LTB                                                           | Lymphotoxin beta (TNF superfamily, member 3)                                                         | LTB     | 4050 | 1.42 | 1 834-850(1.42)                                                                                                                                                                                                                                                 |
| 212 | 1116   | NM_002342 | LTBR                                                          |                                                                                                      |         |      |      |                                                                                                                                                                                                                                                                 |
| 234 | 42712  | NM_002382 | MVC                                                           | MYC associated factor X                                                                              | MAX     | 4149 | 0.88 | 1 787-802(0.88)                                                                                                                                                                                                                                                 |
| 240 | 407995 | NM_002415 | MIF                                                           | Macrophage migration inhibitory factor (glycosylation-inhibiting factor)                             |         |      |      |                                                                                                                                                                                                                                                                 |
| 241 | 202453 | NM_002467 | MYC                                                           | V-myc myelocytomatosis viral oncogene homolog (avian)                                                | MYC     | 4609 | 0.42 | 2 1983-1999(0.42) 2103-2119(0.42)                                                                                                                                                                                                                               |
| 242 | 82116  | NM_002468 | MYD88                                                         | Myeloid differentiation primary response gene (88)                                                   | MYD88   | 4615 | 1    | 1 1045-1061(1.00)                                                                                                                                                                                                                                               |
| 254 | 73090  | NM_002502 | NFKB2                                                         |                                                                                                      |         |      |      |                                                                                                                                                                                                                                                                 |
| 256 | 9731   | NM_002503 | NFKB1                                                         |                                                                                                      |         |      |      |                                                                                                                                                                                                                                                                 |
| 263 | 219140 | NM_002521 | NPPB                                                          | Natriuretic peptide precursor B                                                                      | NPPB    | 4879 | 0.42 | 1 628-644(0.42)                                                                                                                                                                                                                                                 |
| 269 | 64054  | NM_002542 | PAK1                                                          |                                                                                                      |         |      |      |                                                                                                                                                                                                                                                                 |
| 270 | 1976   | NM_002576 | PDGFB                                                         | P21 protein (Cdc42/Rac)-activated kinase 1                                                           | PAK1    | 5058 | 0.42 | 2 849-863(0.42) 1408-1424(0.42)                                                                                                                                                                                                                                 |
| 271 | 386532 | NM_002608 | PIN1                                                          | Platelet-derived growth factor beta polypeptide (simian sarcoma viral (v-sis) oncogene homolog)      | PDGFB   | 5155 | 2.42 | 3 2291-2307(0.01) 3340-3356(2.42)                                                                                                                                                                                                                               |
| 273 | 187543 | NM_002658 | PPP3CB                                                        | Plasminogen activator, urokinase                                                                     | PLAU    | 5328 | 1    | 2 2225-2241(1.00) 2251-2266(0.29)                                                                                                                                                                                                                               |
| 232 | 44584  | NM_002750 | MAPK8                                                         | Mitogen-activated protein kinase 8                                                                   | MAPK8   | 5399 | 1.42 | 1 643-659(1.42)                                                                                                                                                                                                                                                 |
| 233 | 348446 | NM_002752 | MAPK9                                                         | Mitogen-activated protein kinase 9                                                                   | MAPK9   | 5601 | 0.01 | 1 1885-1911(0.01)                                                                                                                                                                                                                                               |
| 229 | 25209  | NM_002753 | MAPK10                                                        | Mitogen-activated protein kinase 10                                                                  | MAPK10  | 5602 | 2.42 | 2 963-979(2.42) 1915-1931(2.42)                                                                                                                                                                                                                                 |
| 277 | 257266 | NM_002838 | RAF1                                                          | Protein tyrosine phosphatase, receptor type, C                                                       | PTPRC   | 5788 | 2.42 | 7 362-378(0.83) 794-810(1.42) 1120-1136(0.42) 2722-2737(1.29) 3823-3839(0.42) 4752-4768(1.00) 4845-4861(2.42)                                                                                                                                                   |
| 278 | 44313  | NM_002880 | REL                                                           | V-rat-1 murine leukemia viral oncogene homolog 1                                                     | RAF1    | 5894 | 0.42 | 2 1760-1776(0.01) 2952-2968(0.42)                                                                                                                                                                                                                               |
| 279 | 132954 | NM_002908 | RELA                                                          | V-rel reticuloendotheliosis viral oncogene homolog (avian)                                           | REL     | 5966 | 1.42 | 4 1747-1763(0.01) 2047-2063(1.29) 2127-2143(1.42) 2165-2180(0.29) c-Rel                                                                                                                                                                                         |
| 27  | 72918  | NM_002981 | CCL1                                                          |                                                                                                      |         |      |      |                                                                                                                                                                                                                                                                 |
| 36  | 303649 | NM_002982 | CCL2                                                          | Chemokine (C-C motif) ligand 2                                                                       | CCL2    | 6347 | 2.42 | 4 455-471(1.01) 492-508(2.00) 524-540(0.42) 573-589(2.42)                                                                                                                                                                                                       |
| 43  | 73817  | NM_002983 | CCL3                                                          | Chemokine (C-C motif) ligand 3                                                                       | CCL3    | 6348 | 1.83 | 2 515-530(0.29) 547-563(1.83)                                                                                                                                                                                                                                   |
| 44  | 75703  | NM_002984 | CCL4                                                          |                                                                                                      |         |      |      |                                                                                                                                                                                                                                                                 |
| 45  | 489044 | NM_002985 | CCL5                                                          |                                                                                                      |         |      |      |                                                                                                                                                                                                                                                                 |
| 28  | 54460  | NM_002986 | CCL11                                                         | Chemokine (C-C motif) ligand 11                                                                      | CCL11   | 6356 | 1.42 | 2 562-578(1.42) 630-646(1.42) CCL11 eotaxin-1                                                                                                                                                                                                                   |
| 33  | 66742  | NM_002987 | CCL17                                                         |                                                                                                      |         |      |      |                                                                                                                                                                                                                                                                 |
| 34  | 16530  | NM_002988 | CCL18                                                         | Chemokine (C-C motif) ligand 18 (pulmonary and activation-regulated)                                 | CCL18   | 6362 | 1    | 1 509-525(1.00)                                                                                                                                                                                                                                                 |
| 38  | 5797   | NM_002989 | CCL21                                                         | Chemokine (C-C motif) ligand 21                                                                      | CCL21   | 6366 | 3    | 1 824-840(3.00)                                                                                                                                                                                                                                                 |
| 39  | 97203  | NM_002990 | CCL22                                                         | Chemokine (C-C motif) ligand 22                                                                      | CCL22   | 6367 | 2.29 | 4 895-910(2.29) 1353-1369(0.42) 1677-1693(0.42) 2027-2043(1.42) CCL22 MDC                                                                                                                                                                                       |
| 41  | 247838 | NM_002991 | CCL24                                                         | Chemokine (C-C motif) ligand 24                                                                      | CCL24   | 6369 | 0.84 | 1 100-116(0.84)                                                                                                                                                                                                                                                 |
| 94  | 164021 | NM_002993 | CXCL6                                                         | Chemokine (C-X-C motif) ligand 6 (granulocyte chemoattractant protein 2)                             | CXCL6   | 6372 | 1.36 | 5 496-513(1.36) 626-642(0.42) 734-750(0.01) 789-804(0.29) 1311-1327(0.42)                                                                                                                                                                                       |
| 93  | 89714  | NM_002994 | CXCL5                                                         | Chemokine (C-X-C motif) ligand 5                                                                     | CXCL5   | 6374 | 1.29 | 6 541-557(0.42) 587-703(0.83) 781-797(0.01) 850-865(0.29) 931-946(1.29) 1378-1394(0.42)                                                                                                                                                                         |
| 359 | 438445 | NM_002995 | NXCL2                                                         | Chemokine (C motif) ligand 1                                                                         | NXCL1   | 6375 | 0.71 | 2 768-783(0.71) 1174-1190(0.42)                                                                                                                                                                                                                                 |
| 84  | 80420  | NM_002996 | CXCL1                                                         | Chemokine (C-X-C motif) ligand 1                                                                     | CXCL1   | 6376 | 1    | 1 355-377(1.00)                                                                                                                                                                                                                                                 |
| 290 | 414795 | NM_003006 | SERPINE1                                                      |                                                                                                      |         |      |      |                                                                                                                                                                                                                                                                 |
| 222 | 134106 | NM_003010 | MAP2K4                                                        | Mitogen-activated protein kinase kinase 4                                                            | MAP2K4  | 6416 | 1.01 | 1 354-570(0.42) 1795-1809(0.42) 1863-1879(1.01)                                                                                                                                                                                                                 |
| 301 | 444006 | NM_003111 | SRF                                                           | Serum response factor (c-fos serum response element-binding transcription factor)                    |         |      |      |                                                                                                                                                                                                                                                                 |
| 302 | 21486  | NM_003131 | STAT1                                                         | Serum response factor (c-fos serum response element-binding transcription factor)                    | SRF     | 6722 | 3.42 | 7 2371-2387(0.01) 2575-2591(3.42) 2628-2644(0.01) 3274-3290(0.02) 3667-3682(0.12) 3952-3968(1.00) 4055-4070(0.71)                                                                                                                                               |
| 304 | 437475 | NM_003151 | STAT6                                                         |                                                                                                      |         |      |      |                                                                                                                                                                                                                                                                 |
| 305 | 432466 | NM_003153 | TBK1                                                          |                                                                                                      |         |      |      |                                                                                                                                                                                                                                                                 |
| 365 | 248116 | NM_003175 | IKK1                                                          |                                                                                                      |         |      |      |                                                                                                                                                                                                                                                                 |
| 227 | 590345 | NM_003188 | MAP3K7                                                        | Mitogen-activated protein kinase kinase kinase 7                                                     | MAP3K7  | 6885 | 1.29 | 3 1264-1280(0.42) 1388-1403(0.29) 2087-2102(1.29)                                                                                                                                                                                                               |
| 308 | 154970 | NM_003212 | TGFB1                                                         | Transforming growth factor beta 1                                                                    | TGFB1   | 6997 | 1.42 | 2 1409-1425(1.01) 1476-1492(1.42)                                                                                                                                                                                                                               |
| 310 | 1103   | NM_003236 | TGFB1                                                         | Transforming growth factor, alpha                                                                    | TGFA    | 7039 | 4    | 6 917-933(0.01) 1135-1151(1.42) 2161-2177(0.42) 3793-3809(0.42) 3891-3908(0.71) 4017-4033(4.00)                                                                                                                                                                 |
| 313 | 2025   | NM_003238 | TGFB3                                                         |                                                                                                      |         |      |      |                                                                                                                                                                                                                                                                 |
| 314 | 421406 | NM_003239 | TGFB3                                                         |                                                                                                      |         |      |      |                                                                                                                                                                                                                                                                 |
| 317 | 342874 | NM_003242 | TGFB3                                                         |                                                                                                      |         |      |      |                                                                                                                                                                                                                                                                 |
| 318 | 161999 | NM_003243 | TGIF                                                          | Transforming growth factor, beta receptor III                                                        | TGFB3   | 7049 | 1    | 2 3615-3631(1.00) 3815-3831(0.83)                                                                                                                                                                                                                               |
| 319 | 5184   | NM_003244 | THL1                                                          | TGF-beta induced factor homeobox 1                                                                   | TGIF1   | 7050 | 1.83 | 2 1211-1227(0.42) 1349-1365(1.83)                                                                                                                                                                                                                               |
| 321 | 120551 | NM_003254 | TLE10                                                         |                                                                                                      |         |      |      |                                                                                                                                                                                                                                                                 |
| 131 | 151250 | NM_003259 | ICAM5                                                         | Interleukin adhesion molecule 5, telencephalin                                                       | ICAM5   | 7087 | 0.83 | 1 2882-2908(0.83)                                                                                                                                                                                                                                               |

|     |        |           |           |                                                                                                 |           |       |      |   |                                                                                                                                               |
|-----|--------|-----------|-----------|-------------------------------------------------------------------------------------------------|-----------|-------|------|---|-----------------------------------------------------------------------------------------------------------------------------------------------|
| 323 | 29499  | NM_003264 | TLR3      | Toll-like receptor 3                                                                            | TLR3      | 7097  | 1    | 4 | 426-442(0.42) 686-702(0.01) 1020-1036(1.00) 2467-2483(0.42)                                                                                   |
| 324 | 174312 | NM_003265 | TLR4      | Toll-like receptor 3                                                                            | TLR3      | 7098  | 2.42 | 4 | 1408-1423(0.29) 2068-2084(2.42) 2533-2549(1.42) 2812-2827(1.29)                                                                               |
| 325 | 114403 | NM_003266 | TLR5      | Data not found                                                                                  | TLR5      | 7105  | 1.42 | 4 | 1004-1020(0.42) 3194-3210(0.83) 3634-3650(0.39) 3821-3837(1.42)                                                                               |
| 326 | 366986 | NM_003268 | TLR6      | Toll-like receptor 5                                                                            | TLR5      | 7100  | 2.42 | 3 | 426-441(0.13) 1133-1149(2.42) 3305-3321(0.82)                                                                                                 |
| 347 | 8375   | NM_003300 | TRAF4     | TNF receptor-associated factor 3                                                                | TRAF3     | 7187  | 0.42 | 2 | 2172-2188(0.42) 2342-2358(0.42)                                                                                                               |
| 341 | 652    | NM_000074 | NM_003326 | Tumor necrosis factor (ligand) superfamily, member 5 (hyper-igM syndrome)                       | TNFSF4    | 7292  | 1.88 | 3 | 1903-1919(1.42) 3276-3292(0.01) 3414-3429(1.88)                                                                                               |
| 353 | 116237 | NM_003331 | VAV1      | Tumor necrosis factor (ligand) superfamily, member 4                                            | TYK2      | 7297  | 0.42 | 1 | 4054-4070(0.42)                                                                                                                               |
| 355 | 267606 | NM_003371 | VAV2      | Tyrosine kinase 2                                                                               |           |       |      |   |                                                                                                                                               |
| 358 | 174228 | NM_003376 | VCL1      | Vascular endothelial growth factor A                                                            | VEGFA     | 7422  | 1.01 | 1 | 1177-1191(1.01)                                                                                                                               |
| 363 | 106309 | NM_003403 | ZFPM2     | YY1 transcription factor                                                                        | YY1       | 7528  | 0.42 | 2 | 114-130(0.42) 2427-2443(0.42)                                                                                                                 |
| 95  | 421986 | NM_003467 | CXCR4     | Chemokine (C-X-C motif) receptor 4                                                              | CXCR4     | 7852  | 0.71 | 1 | 1462-1477(0.71)                                                                                                                               |
| 247 | 101695 | NM_003581 | NCK2      |                                                                                                 |           |       |      |   |                                                                                                                                               |
| 141 | 43505  | NM_003639 | KKKG      |                                                                                                 |           |       |      |   |                                                                                                                                               |
| 340 | 181097 | NM_003701 | TNFSF4    | Tumor necrosis factor (ligand) superfamily, member 11                                           | TNFSF11   | 8600  | 2    | 4 | 1322-1338(0.42) 1572-1588(2.00) 1590-1606(1.42) 2159-2175(0.42)                                                                               |
| 69  | 166186 | NM_003741 | CHRD      |                                                                                                 |           |       |      |   |                                                                                                                                               |
| 294 | 405946 | NM_003745 | SOC52     | Suppressor of cytokine signaling 1                                                              | SOC51     | 8651  | 0.29 | 2 | 1160-1174(0.01) 1201-1216(0.29)                                                                                                               |
| 344 | 223474 | NM_003789 | TRAF1     |                                                                                                 |           |       |      |   |                                                                                                                                               |
| 282 | 410774 | NM_003804 | RUNX1     | Receptor (TNFRSF)-interacting serine-threonine kinase 1                                         | RIPK1     | 8737  | 0.12 | 1 | 12371-2388(0.12)                                                                                                                              |
| 105 | 86131  | NM_003824 | FADD      |                                                                                                 |           |       |      |   |                                                                                                                                               |
| 333 | 159    | NM_001065 | NM_003839 | Tumor necrosis factor receptor superfamily, member 1A                                           | TNFRSF11A | 8792  | 2.42 | 2 | 2035-2051(1.42) 2700-2716(2.42)                                                                                                               |
| 162 | 159301 | NM_003855 | IL18R1    | Interleukin 18 receptor 1                                                                       | IL18R1    | 8809  | 1.42 | 9 | 431-447(0.42) 897-913(0.01) 1062-1078(0.42) 2402-2418(0.42) 2584-2600(0.42) 2655-2671(0.01) 3326-3250(0.25) 3303-3319(1.42) 3430-3446(0.42)   |
| 295 | 436943 | NM_003877 | SOC53     | Suppressor of cytokine signaling 2                                                              | SOC52     | 8835  | 0.42 | 1 | 1458-1474(0.42)                                                                                                                               |
| 10  | 40368  | NM_003916 | AP152     | Adaptor-related protein complex 1, sigma 2 subunit                                              | AP152     | 8905  | 2.83 | 5 | 637-653(2.83) 848-864(1.00) 1327-1343(0.42) 1654-1670(1.42) 2239-2255(0.42)                                                                   |
| 225 | 440315 | NM_003954 | MAP3K14   | Mitogen-activated protein kinase kinase kinase 14                                               |           |       |      |   |                                                                                                                                               |
| 296 | 528717 | NM_003955 | SOC54     |                                                                                                 |           |       |      |   |                                                                                                                                               |
| 202 | 1048   | NM_003994 | KITLG     | KIT ligand                                                                                      | KITLG     | 4254  | 1.42 | 2 | 401-417(1.42) 1241-1257(0.42)                                                                                                                 |
| 253 | 160557 | NM_003998 | NFKB1     | Nuclear factor of kappa light polypeptide gene enhancer in B-cells 1                            | NFKB1     | 4790  | 0.83 | 3 | 751-767(0.83) 1194-1210(0.83) 3476-3494(0.39) p50 (NF-kB subunit)                                                                             |
| 110 | 407482 | NM_004116 | KBP1B     | K506 binding protein 1B, 12.6 kDa                                                               | KBP1B     | 2281  | 0.7  | 1 | 651-668(0.70)                                                                                                                                 |
| 30  | 272493 | NM_004166 | CCL14     | Data not found                                                                                  |           |       |      |   |                                                                                                                                               |
| 31  | 272493 | NM_004167 | CCL15     | Data not found                                                                                  |           |       |      |   |                                                                                                                                               |
| 297 | 169836 | NM_004232 | SOC55     | Suppressor of cytokine signaling 6                                                              | SOC56     | 9306  | 1.42 | 4 | 1845-1862(0.42) 1976-1992(1.42) 2281-2296(0.29) 2415-2431(0.25)                                                                               |
| 348 | 385685 | NM_004295 | TRAF5     |                                                                                                 |           |       |      |   |                                                                                                                                               |
| 2   | 371974 | NM_004302 | ACVR1B    |                                                                                                 |           |       |      |   |                                                                                                                                               |
| 12  | 76366  | NM_004322 | BAD       | BCL2-associated agonist of cell death                                                           | BAD       | 572   | 0.83 | 1 | 1689-2160(0.83)                                                                                                                               |
| 17  | 2534   | NM_004329 | BMPRIA    | Bone morphogenetic protein receptor, type IA                                                    | BMPRIA    | 657   | 2.42 | 4 | 2126-2142(0.84) 2151-2167(1.83) 2221-2237(0.83) 2893-2909(2.42)                                                                               |
| 284 | 332053 | NM_004348 | SAA1      |                                                                                                 |           |       |      |   |                                                                                                                                               |
| 53  | 46468  | NM_004367 | CCR6      | Chemokine (C-C motif) receptor 6                                                                | CCR6      | 1235  | 2    | 9 | 964-980(0.42) 1608-1624(0.01) 1669-1685(1.00) 1851-1867(1.42) 2275-2291(0.42) 2347-2362(0.29) 2578-2594(2.00) 3074-3092(0.39) 3479-3495(0.04) |
| 76  | 22315  | NM_004378 | CREB1     | CAMP responsive element binding protein 1                                                       | CREB1     | 1385  | 2    | 5 | 1667-1771(1.29) 1775-1791(0.42) 1916-1932(1.42) 2307-2414(0.71) 2479-2495(2.00)                                                               |
| 77  | 270804 | NM_004380 | CREBBP    | CREB binding protein                                                                            | CREBBP    | 1387  | 2    | 5 | 7677-7693(0.01) 7752-7768(0.42) 7843-7859(0.42) 7904-7920(0.36) 8482-8508(2.00)                                                               |
| 99  | 74088  | NM_004430 | EGR3      | Early growth response 3                                                                         | EGR3      | 1960  | 3.29 | 6 | 2686-2701(3.29) 2986-3001(0.71) 3369-3385(0.42) 3944-3960(2.42) 4137-4153(1.42) 4321-4336(0.29)                                               |
| 121 | 102548 | NM_004491 | GRF1      | Glucocorticoid receptor DNA binding factor 1                                                    | GRF1      | 2909  | 0.42 | 1 | 1498-1514(0.42)                                                                                                                               |
| 146 | 204891 | NM_004512 | IL11RA    |                                                                                                 |           |       |      |   |                                                                                                                                               |
| 157 | 170359 | NM_004513 | IL16      | Interleukin 16 (lymphocyte chemoattractant factor)                                              | IL16      | 3603  | 1    | 4 | 2563-2579(1.00) 2710-2726(0.84) 3006-3022(0.42) 4951-4967(0.42)                                                                               |
| 252 | 77810  | NM_004554 | NFATC4    | Nuclear factor of activated T-cells, cytoplasmic, calcineurin-dependent 3                       | NFATC3    | 4775  | 0.42 | 2 | 1955-1971(0.42) 3756-3772(0.42)                                                                                                               |
| 251 | 172674 | NM_004555 | NFATC3    | Nuclear factor of activated T-cells, cytoplasmic, calcineurin-dependent 3                       | NFATC3    | 4775  | 0.42 | 2 | 1955-1971(0.42) 3756-3772(0.42)                                                                                                               |
| 257 | 458276 | NM_004556 | NFKBIE    |                                                                                                 |           |       |      |   |                                                                                                                                               |
| 32  | 10456  | NM_004598 | CCL16     | Chemokine (C-C motif) ligand 16                                                                 | CCL16     | 6300  | 1.42 | 2 | 2662-678(1.42) 833-849(1.25)                                                                                                                  |
| 37  | 75468  | NM_004591 | CCL20     | Chemokine (C-C motif) ligand 20                                                                 | CCL20     | 6364  | 1.42 | 2 | 553-569(1.42) 754-768(1.42)                                                                                                                   |
| 316 | 82028  | NM_004612 | TGFB2     | Transforming growth factor, beta receptor 1                                                     | TGFB1     | 7046  | 2.42 | 3 | 223-239(0.42) 1641-1657(0.83) 2148-2164(2.42)                                                                                                 |
| 349 | 444172 | NM_004619 | TRAF6     | TNF receptor-associated factor 5                                                                | TRAF5     | 7188  | 1.83 | 4 | 1871-1887(0.83) 2692-2707(0.83) 3067-3083(0.42) 3253-3269(1.83)                                                                               |
| 350 | 302740 | NM_004620 | TRAF6     | TNF receptor-associated factor 6                                                                | TRAF6     | 7189  | 1.84 | 2 | 1326-1342(0.83) 2459-2475(1.84)                                                                                                               |
| 167 | 25313  | NM_004633 | IL1R2     | Interleukin 1 receptor, type II                                                                 | IL1R2     | 7850  | 0.83 | 1 | 1134-1330(0.83)                                                                                                                               |
| 286 | 118684 | NM_004757 | SDF2      | Aminocyclase complex-interacting multifunctional protein 1                                      | AIMP1     | 9255  | 0.42 | 1 | 1559-1570(0.42)                                                                                                                               |
| 120 | 299567 | NM_004778 | GPR44     | G protein-coupled receptor 44                                                                   | GPR44     | 11251 | 1.71 | 2 | 1493-1508(1.71) 2754-2770(1.42) CRTH2 human                                                                                                   |
| 66  | 72901  | NM_004936 | CDKN2B    | Cyclin-dependent kinase inhibitor 2B (p15, inhibits CDK4)                                       | CDKN2B    | 1030  | 0.42 | 2 | 1972-1988(0.01) 2049-2065(0.42)                                                                                                               |
| 197 | 434374 | NM_004972 | JAK2      | Janus kinase 2                                                                                  | JAK2      | 3717  | 2.42 | 5 | 572-588(2.42) 1465-1480(0.29) 2120-2136(1.01) 4253-4269(0.42) 4544-4560(1.42)                                                                 |
| 298 | 2754   | NM_005007 | NFKB1.1   | NF-kB1 nuclear factor of kappa light polypeptide gene enhancer in B-cells inhibitor-like 1 IKB1 |           |       |      |   |                                                                                                                                               |
| 40  | 169191 | NM_005064 | CCL23     |                                                                                                 |           |       |      |   |                                                                                                                                               |
| 264 | 460294 | NM_005085 | NUP214    | Nucleoporin 214kDa                                                                              | NUP214    | 8021  | 0.42 | 1 | 11313-1329(0.42)                                                                                                                              |
| 14  | 31210  | NM_005178 | BCL3      | B-cell CLL/lymphoma 3                                                                           | BCL3      | 602   | 0.42 | 1 | 1178-1194(0.42)                                                                                                                               |
| 24  | 334330 | NM_005184 | CALM3     | Calmodulin 3 (phosphorylase kinase, delta)                                                      | CALM3     | 808   | 1.01 | 1 | 1120-1161(1.01)                                                                                                                               |
| 62  | 838    | NM_005191 | CDB0      | CDB0 molecule                                                                                   | CDB0      | 941   | 0.42 | 3 | 215-231(0.42) 813-829(0.42) 1813-1829(0.42)                                                                                                   |
| 67  | 99029  | NM_005194 | CEBPB     | CCAAT/enhancer binding protein (C/EBP), beta                                                    | CEBPB     | 1051  | 0.42 | 1 | 1711-1727(0.42)                                                                                                                               |
| 55  | 113222 | NM_005201 | CCR8      | Chemokine (C-C motif) receptor 8                                                                | CCR8      | 1237  | 1.42 | 3 | 1928-1943(0.29) 2326-2342(1.42) 2351-2367(0.42)                                                                                               |
| 83  | 247824 | NM_005214 | CTLA4     | Cytotoxic T-lymphocyte-associated protein 4                                                     | CTLA4     | 1493  | 0.42 | 2 | 2384-2500(0.42) 1439-1455(0.42)                                                                                                               |
| 100 | 181126 | NM_005229 | ELK1      | ELK1, member of ETS oncogene family                                                             | ELK1      | 2002  | 0.42 | 3 | 1777-1793(0.42) 2806-2822(0.01)                                                                                                               |
| 101 | 288555 | NM_005230 | ELK3      |                                                                                                 |           |       |      |   |                                                                                                                                               |
| 104 | 436019 | NM_005241 | EV11      | MDS1 and EV11 complex locus                                                                     | MECOM     | 2122  | 0.01 | 1 | 2305-2321(0.01)                                                                                                                               |
| 112 | 25647  | NM_005252 | FOS       | FOS V-fos/FBJ murine osteosarcoma viral oncogene homolog                                        | FOS       | 2353  | 1.13 | 3 | 1517-1533(0.83) 1783-1798(1.13) 1937-1953(0.83)                                                                                               |
| 114 | 301612 | NM_005253 | FOSL2     |                                                                                                 |           |       |      |   |                                                                                                                                               |
| 118 | 71172  | NM_005263 | GF11      | Growth factor independent 1 transcription repressor                                             | GF11      | 2672  | 2.42 | 3 | 3583-2599(1.00) 2679-2695(0.25) 2763-2779(2.42)                                                                                               |
| 361 | 203206 | NM_005283 | XPOS      |                                                                                                 |           |       |      |   |                                                                                                                                               |
| 126 | 37003  | NM_005343 | HRAS      |                                                                                                 |           |       |      |   |                                                                                                                                               |
| 201 | 2780   | NM_005354 | JUND      |                                                                                                 |           |       |      |   |                                                                                                                                               |
| 216 | 7586   | NM_005359 | MAP3K4    |                                                                                                 |           |       |      |   |                                                                                                                                               |
| 221 | 134859 | NM_005360 | MAP3K4    | MAP3K4 musculoaponeurotic fibrosarcoma oncogene homolog (avian)                                 | SMAD4     | 4089  | 0.83 | 3 | 1952-1968(0.42) 2364-2380(0.83) 2494-2509(0.29)                                                                                               |
| 245 | 439671 | NM_005380 | NBL1      |                                                                                                 |           |       |      |   |                                                                                                                                               |
| 29  | 414629 | NM_005408 | CCL13     | Chemokine (C-C motif) ligand 13                                                                 | CCL13     | 6357  | 3    | 2 | 2524-2403(0.00) 654-669(0.12)                                                                                                                 |
| 88  | 108262 | NM_005409 | CXCL11    | Chemokine (C-X-C motif) ligand 11                                                               | CXCL11    | 6379  | 0.42 | 2 | 373-389(0.83) 1153-1169(0.25)                                                                                                                 |
| 354 | 42448  | NM_005428 | VAV2      | Vav 1 guanine nucleotide exchange factor                                                        | VAV1      | 7409  | 0.83 | 1 | 302-318(0.83)                                                                                                                                 |
| 113 | 283656 | NM_005438 | FOSL1     |                                                                                                 |           |       |      |   |                                                                                                                                               |
| 68  | 248204 | NM_005454 | CER1      |                                                                                                 |           |       |      |   |                                                                                                                                               |
| 51  | 184926 | NM_005508 | CCR4      | Chemokine (C-C motif) receptor 4                                                                | CCR4      | 1233  | 0.42 | 3 | 423-439(0.42) 967-983(0.42) 1191-1207(0.42)                                                                                                   |
| 149 | 213804 | NM_005535 | IL12RB1   | Interleukin 12 receptor, beta 1 IL-12Rb1                                                        |           |       |      |   |                                                                                                                                               |
| 194 | 211576 | NM_005546 | ITK       | IL2-inducible T-cell kinase itk                                                                 | ITK       | 3702  | 0.42 | 2 | 21197-1212(0.29) 3981-3997(0.42)                                                                                                              |
| 195 | 157091 | NM_005547 | IVL       | Involucrin                                                                                      |           |       |      |   |                                                                                                                                               |
| 218 | 153863 | NM_005585 | MADH5     | SMAD family member 6                                                                            | SMAD6     | 4091  | 0.42 | 1 | 2579-2595(0.42)                                                                                                                               |
| 235 | 415033 | NM_005587 | MEF2A     | Myocyte enhancer factor 2A                                                                      | MEF2A     | 4305  | 2    | 6 | 206-222(0.00) 1026-1042(0.42) 2035-2050(0.29) 2690-2706(0.42) 2830-2846(0.42) 2863-2879(1.01)                                                 |
| 243 | 178023 | NM_005593 | MYF5      | Myogenic factor 5                                                                               | MYF5      | 4617  | 1    | 1 | 1010-1026(0.42) 1116-1132(1.00)                                                                                                               |
| 275 | 280604 | NM_005605 | PPP3R1    | Protein phosphatase 3, catalytic subunit, gamma isozyme                                         | PPP3CC    | 5533  | 1.29 | 3 | 707-723(0.42) 1921-1937(0.42) 2030-2045(1.29)                                                                                                 |
| 47  | 271387 | NM_005623 | CCL8      | Chemokine (C-C motif) ligand 8                                                                  | CCL8      | 6355  | 1.83 | 3 | 8331-8480(0.29) 870-884(0.43) 1109-1125(1.83)                                                                                                 |
| 42  | 310511 | NM_005624 | CCL25     |                                                                                                 |           |       |      |   |                                                                                                                                               |
| 309 | 170009 | NM_005653 | TGFA      | Transforming factor CP2                                                                         | TCF2      | 7024  | 1.71 | 3 | 1473-1489(0.42) 1590-1605(1.71) 2330-2347(0.29) human CP2                                                                                     |
| 345 | 437575 | NM_005658 | TRAF2     |                                                                                                 | TRAF1     | 7185  | 0.42 | 1 | 1866-1882(0.42)                                                                                                                               |
| 161 | 325978 | NM_005699 | IL18BP    |                                                                                                 |           |       |      |   |                                                                                                                                               |
| 138 | 530902 | NM_005849 | IGSF6     |                                                                                                 |           |       |      |   |                                                                                                                                               |
| 213 | 388294 | NM_005900 | MADH1     | SMAD family member 1                                                                            | SMAD1     | 4086  | 2    | 1 | 1434-450(2.00)                                                                                                                                |

|     |           |           |                                          |                                                                                               |          |        |      |                                                                                                                                                                                                                                                                                                                                                                                                                                   |
|-----|-----------|-----------|------------------------------------------|-----------------------------------------------------------------------------------------------|----------|--------|------|-----------------------------------------------------------------------------------------------------------------------------------------------------------------------------------------------------------------------------------------------------------------------------------------------------------------------------------------------------------------------------------------------------------------------------------|
| 214 | 110741    | NM_005901 | MADH2                                    | SMAD family member 2                                                                          | SMAD2    | 4087   | 0.71 | 41061-1077(0.42) 1897-1913(0.42) 2012-2028(0.42) 2153-2168(0.71)                                                                                                                                                                                                                                                                                                                                                                  |
| 215 | 288261    | NM_005902 | MADH3                                    | SMAD family member 3                                                                          | SMAD3    | 4088   | 3.42 | 12055-2071(3.42)                                                                                                                                                                                                                                                                                                                                                                                                                  |
| 217 | 167703    | NM_005903 | MADH5                                    | SMAD family member 5                                                                          | SMAD5    | 4090   | 0.88 | 5073-9870(0.88) 1105-1121(0.42) 1475-1490(0.88) 1738-1753(0.71) 1868-1884(0.83)                                                                                                                                                                                                                                                                                                                                                   |
| 219 | 310849    | NM_005904 | MADH7                                    | SMAD family member 7                                                                          | SMAD7    | 4092   | 3    | 21694-1710(1.21) 2833-2849(3.00)                                                                                                                                                                                                                                                                                                                                                                                                  |
| 220 | 528630    | NM_005905 | MADH9                                    | SMAD family member 9                                                                          | SMAD9    | 4093   | 0.88 | 21342-1357(0.88) 1541-1557(0.42)                                                                                                                                                                                                                                                                                                                                                                                                  |
| 236 | 78881     | NM_005919 | MFE2B                                    |                                                                                               |          |        |      |                                                                                                                                                                                                                                                                                                                                                                                                                                   |
| 237 | 77955     | NM_005920 | MFE2D                                    |                                                                                               |          |        |      |                                                                                                                                                                                                                                                                                                                                                                                                                                   |
| 352 | 75514     | NM_006022 | TYK2                                     | TSC22 domain family, member 1                                                                 | TSC22D1  | 8848   | 1.42 | 4247-262(1.29) 1293-1308(0.29) 1365-1382(0.29) 1628-1644(1.42)                                                                                                                                                                                                                                                                                                                                                                    |
| 327 | 179152    | NM_006068 | TLR7                                     | Toll-like receptor 6                                                                          | TLR6     | 10333  | 2.42 | 4954-970(2.42) 1129-1142(0.16) 1265-1281(0.42) 1533-1549(0.01)                                                                                                                                                                                                                                                                                                                                                                    |
| 356 | 109225    | NM_006113 | VCAM1                                    | Vav 3 guanine nucleotide exchange factor                                                      | VAV3     | 10451  | 1.71 | 7356-372(0.42) 864-880(0.42) 1981-1997(0.01) 3007-3023(0.42) 3547-3563(0.42) 4175-4191(0.42) 4712-4729(1.71)                                                                                                                                                                                                                                                                                                                      |
| 228 | 403927    | NM_006116 | MAP3K7IP1                                |                                                                                               |          |        |      |                                                                                                                                                                                                                                                                                                                                                                                                                                   |
| 57  | 1987      | NM_006139 | CD28                                     | CD28 molecule                                                                                 | CD28     | 940    | 0.84 | 41294-1311(0.42) 2127-2142(0.71) 3101-3117(0.84) 3146-3162(0.42)                                                                                                                                                                                                                                                                                                                                                                  |
| 292 | 75367     | NM_006142 | SLA Src-like adaptor                     |                                                                                               |          |        |      |                                                                                                                                                                                                                                                                                                                                                                                                                                   |
| 260 | 149466    | NM_006165 | NFKB                                     |                                                                                               |          |        |      |                                                                                                                                                                                                                                                                                                                                                                                                                                   |
| 272 | 77274     | NM_006221 | PLAU                                     |                                                                                               |          |        |      |                                                                                                                                                                                                                                                                                                                                                                                                                                   |
| 46  | 251526    | NM_006273 | CCL7                                     | Chemokine [C-C motif] ligand 7                                                                | CCL7     | 6354   | 0.83 | 1561-577(0.83)                                                                                                                                                                                                                                                                                                                                                                                                                    |
| 35  | 5002      | NM_006274 | CCL19                                    |                                                                                               |          |        |      |                                                                                                                                                                                                                                                                                                                                                                                                                                   |
| 332 | 204044    | NM_006290 | TNFRSF11A                                | Tumor necrosis factor, alpha-induced protein 3                                                | TNFAIP3  | 7128   | 2    | 7923-940(0.29) 3219-3235(0.01) 3262-3278(1.42) 4003-4019(1.83) 4159-4175(0.84) 4228-4244(2.00) 4282-4298(1.83)                                                                                                                                                                                                                                                                                                                    |
| 115 | 9914      | NM_006350 | FST Follistatin Follistatin              | Follistatin                                                                                   | FST      | 10468  | 0.42 | 11335-1351(0.42)                                                                                                                                                                                                                                                                                                                                                                                                                  |
| 90  | 100431    | NM_006419 | XCCL13                                   |                                                                                               |          |        |      |                                                                                                                                                                                                                                                                                                                                                                                                                                   |
| 281 | 390758    | NM_006509 | RIPK1                                    | V-rel reticuloendotheliosis viral oncogene homolog B                                          | RELB     | 5971   | 0.01 | 12272-2288(0.01)<br>2445-2461(0.42) 4094-4110(1.42) 5867-5883(0.42) 6006-6022(0.42) 6441-6457(0.01) 7981-7997(1.42) 8214-8229(0.29) 8282-8298(0.42) 8554-8570(2.42) 8718-8734(0.42) 9042-9057(0.29) 9689-9705(0.42) 9723-9737(0.42) 9900-9916(0.42) 10026-10042(2.42) 10572-10588(2.00) 10831-10847(2.00) 10852-10868(0.42) 11657-11673(0.42) 11789-11803(0.01) 12317-12333(1.83) 12706-12722(0.42) 13796-13811(0.29) NFAT5 human |
| 248 | 86998     | NM_006599 | NFAT5                                    | Nuclear factor of activated T-cells 5, tonicity-responsive                                    | NFAT5    | 10725  | 2.42 | 23                                                                                                                                                                                                                                                                                                                                                                                                                                |
| 226 | 28827     | NM_006609 | MAP3K2                                   | Mitogen-activated protein kinase kinase kinase 2                                              | MAP3K2   | 10746  | 3    | 7<br>1514-1530(0.42) 2035-2051(0.83) 2105-2120(1.88) 2133-2151(0.39) 2174-2190(3.00) 2699-2714(0.29) 2982-2999(0.42)                                                                                                                                                                                                                                                                                                              |
| 96  | 201300    | NM_006639 | CYSLTR1 Cysteinyl leukotriene receptor 1 | CYSLTR1                                                                                       | CYSLTR1  | 10800  | 1    | 315-30(0.29) 842-858(0.42) 1012-1028(1.00)                                                                                                                                                                                                                                                                                                                                                                                        |
| 56  | 225946    | NM_006641 | CCR9                                     | Chemokine [C-C motif] receptor 9                                                              | CCR9     | 10803  | 2.42 | 4890-906(2.42) 1029-1045(0.42) 1209-1225(0.42) 2371-2386(0.71)                                                                                                                                                                                                                                                                                                                                                                    |
| 293 | 50640     | NM_006748 | SOC1                                     | Src-like adaptor                                                                              | SLA      | 6503   | 0.42 | 11153-1169(0.42)<br>692-708(0.01) 1765-1781(1.00) 3127-3143(0.42) 3258-3276(0.97) 3474-3490(0.01) CALM1 calmodulin 1 (phosphorylase kinase, delta) GC NR0                                                                                                                                                                                                                                                                         |
| 22  | 282410    | NM_006888 | CALM1                                    | Calmodulin 1 (phosphorylase kinase, delta)                                                    | CALM1    | 801    | 1    | 5 hnf1(mms score -1.4)                                                                                                                                                                                                                                                                                                                                                                                                            |
| 63  | 27954     | NM_006889 | CD86                                     | CD86 molecule                                                                                 | CD86     | 942    | 0.83 | 31115-1131(0.01) 1188-1204(0.42) 2548-2564(0.83)                                                                                                                                                                                                                                                                                                                                                                                  |
| 287 | 89546     | NM_006923 | SELE                                     |                                                                                               |          |        |      |                                                                                                                                                                                                                                                                                                                                                                                                                                   |
| 955 | NM_007144 |           |                                          | Polycomb group ring finger 2                                                                  | PCGF2    | 7703   | 0.29 | 11372-1387(0.29)                                                                                                                                                                                                                                                                                                                                                                                                                  |
| 303 | 80642     | NM_007315 | STAT4                                    | Signal transducer and activator of transcription 1, 91kDa                                     | STAT1    | 6772   | 1.42 | 41476-1492(0.42) 3264-3280(0.42) 3523-3539(1.42) 4089-4105(0.42)                                                                                                                                                                                                                                                                                                                                                                  |
| 364 | 371617    | NM_012082 | RNF110                                   | Zinc finger protein, multiple type 2                                                          | ZFPM2    | 23414  | 1.42 | 43618-3632(1.01) 3709-3725(1.42) 3745-3761(0.42) 3762-3778(1.25)                                                                                                                                                                                                                                                                                                                                                                  |
| 132 | 56247     | NM_012092 | ICOS                                     | Inducible T-cell co-stimulator                                                                | ICOS     | 29851  | 2.42 | 4495-510(1.29) 1076-1092(2.42) 1527-1543(1.83) 2044-2059(0.29)                                                                                                                                                                                                                                                                                                                                                                    |
| 21  | 435798    | NM_012295 | CABIN1                                   |                                                                                               |          |        |      |                                                                                                                                                                                                                                                                                                                                                                                                                                   |
| 250 | 356321    | NM_012340 | NFATC2                                   |                                                                                               |          |        |      |                                                                                                                                                                                                                                                                                                                                                                                                                                   |
| 261 | 348802    | NM_012342 | BAMBI                                    |                                                                                               |          |        |      |                                                                                                                                                                                                                                                                                                                                                                                                                                   |
| 306 | 272409    | NM_013254 | TBK1                                     | TANK-binding kinase 1                                                                         | TBK1     | 29110  | 2.42 | 4155-1711(8.3) 2248-2264(0.01) 2433-2449(1.42) 2795-2811(1.42)                                                                                                                                                                                                                                                                                                                                                                    |
| 307 | 385847    | NM_013311 | TGFB1                                    | T box 21                                                                                      | TGFB1    | 30039  | 0.29 | 11567-198(0.29) Tbet                                                                                                                                                                                                                                                                                                                                                                                                              |
| 163 | 71979     | NM_013371 | IL19                                     | Interleukin 19                                                                                | IL19     | 29949  | 1.83 | 1656-672(1.83)                                                                                                                                                                                                                                                                                                                                                                                                                    |
| 71  | 40098     | NM_013372 | CKTSF1B1                                 | Gremlin 1, cysteine knot superfamily, homolog (Xenopus laevis)                                | GREM1    | 26585  | 2.42 | 52547-2563(2.42) 3037-3053(1.42) 3181-3196(0.29) 3357-3373(1.42) 3552-3568(2.00)                                                                                                                                                                                                                                                                                                                                                  |
| 259 | 356764    | NM_013432 | NFKBIL2                                  | Nuclear factor of kappa light polypeptide gene enhancer in B-cells inhibitor-like 2 iKBR      |          |        |      |                                                                                                                                                                                                                                                                                                                                                                                                                                   |
| 140 | 321045    | NM_014602 | IKBE                                     | Inhibitor of kappa light polypeptide gene enhancer in B-cells, kinase epsilon                 | IKBE     | 9641   | 0.01 | 12062-2078(0.01)                                                                                                                                                                                                                                                                                                                                                                                                                  |
| 150 | 129751    | NM_014339 | IL17B                                    |                                                                                               |          |        |      |                                                                                                                                                                                                                                                                                                                                                                                                                                   |
| 206 | 48997     | NM_014387 | LAT                                      | Linker for activation of T cells                                                              |          |        |      |                                                                                                                                                                                                                                                                                                                                                                                                                                   |
| 336 | 355307    | NM_014452 | TNFRSF7                                  | Tumor necrosis factor receptor superfamily, member 7                                          | TNFRSF21 | 27242  | 0.83 | 6882-898(0.83) 1761-1777(0.42) 2446-2462(0.42) 2616-2631(0.71) 2990-3006(0.83) 3207-3223(0.01)                                                                                                                                                                                                                                                                                                                                    |
| 312 | 169300    | NM_015927 | TGFB2                                    |                                                                                               |          |        |      |                                                                                                                                                                                                                                                                                                                                                                                                                                   |
| 320 | 446641    | NM_016397 | TIMP1                                    |                                                                                               |          |        |      |                                                                                                                                                                                                                                                                                                                                                                                                                                   |
| 328 | 272410    | NM_016562 | TLR8                                     | Toll-like receptor 7                                                                          | TLR7     | 51284  | 0.84 | 23097-3113(0.84) 3337-3353(0.42)                                                                                                                                                                                                                                                                                                                                                                                                  |
| 119 | 278446    | NM_016602 | GPR2                                     |                                                                                               |          |        |      |                                                                                                                                                                                                                                                                                                                                                                                                                                   |
| 329 | 87968     | NM_016610 | TLR9                                     | Data not found                                                                                |          |        | 1.29 | 4740-755(0.29) 2231-2244(0.75) 2690-2706(0.42) 3120-3137(1.29)                                                                                                                                                                                                                                                                                                                                                                    |
| 330 | 241570    | NM_017442 | TNF                                      | Tumor necrosis factor (TNF superfamily, member 2)                                             | TLR9     | 54106  | 1.83 | 1351-367(1.83)                                                                                                                                                                                                                                                                                                                                                                                                                    |
| 351 | 114360    | NM_018646 | TSC22                                    |                                                                                               |          |        |      |                                                                                                                                                                                                                                                                                                                                                                                                                                   |
| 169 | 272373    | NM_018724 | IL20                                     | Interleukin 20                                                                                | IL20     | 56004  | 0.42 | 1698-714(0.42)                                                                                                                                                                                                                                                                                                                                                                                                                    |
| 171 | 10927     | NM_019107 | C19orf10                                 | Chromosome 19 open reading frame 10                                                           | C19orf10 | 56005  | 0.83 | 1981-997(0.83)                                                                                                                                                                                                                                                                                                                                                                                                                    |
| 211 | 130685    | NM_019839 | LTBR42                                   |                                                                                               |          |        |      |                                                                                                                                                                                                                                                                                                                                                                                                                                   |
| 173 | 435970    | NM_019884 | CSK3A                                    | Glycogen synthase kinase 3 alpha                                                              | GSK3A    | 2931   | 0.42 | 11849-1965(0.42)                                                                                                                                                                                                                                                                                                                                                                                                                  |
| 255 | 81328     | NM_020529 | NFKBIA                                   | Nuclear factor of kappa light polypeptide gene enhancer in B-cells inhibitor, alpha           | NFKBIA   | 4792   | 2.83 | 31101-1117(0.42) 1494-1510(2.83) 1520-1536(0.42)                                                                                                                                                                                                                                                                                                                                                                                  |
| 8   | 437877    | NM_020547 | AMHR2                                    |                                                                                               |          |        |      |                                                                                                                                                                                                                                                                                                                                                                                                                                   |
| 362 | 388927    | NM_020750 | YY1                                      | YY1 YY1 transcription factor                                                                  | XPO5     | 57510  | 1.42 | 4631-647(1.42) 4860-4876(0.01) 5071-5087(0.42) 5127-5143(0.83)                                                                                                                                                                                                                                                                                                                                                                    |
| 274 | 75206     | NM_021132 | PPP3C                                    | Protein phosphatase 3, catalytic subunit, beta isozyme                                        | PPP3CB   | 5532   | 0.42 | 2124-2140(0.42) 2678-2697(0.06)                                                                                                                                                                                                                                                                                                                                                                                                   |
| 346 | 297660    | NM_021338 | TRAF3                                    |                                                                                               |          |        |      |                                                                                                                                                                                                                                                                                                                                                                                                                                   |
| 170 | 302014    | NM_021803 | IL21                                     | Interleukin 21                                                                                | IL21     | 59067  | 0.39 | 1584-602(0.39)                                                                                                                                                                                                                                                                                                                                                                                                                    |
| 280 | 307905    | NM_021975 | RELB                                     |                                                                                               |          |        |      |                                                                                                                                                                                                                                                                                                                                                                                                                                   |
| 133 | 37026     | NM_024013 | IFNA1                                    | Interferon, alpha 1                                                                           | IFNA1    | 3439   | 0.42 | 1482-498(0.42)                                                                                                                                                                                                                                                                                                                                                                                                                    |
| 322 | 519033    | NM_020956 | TLR2                                     | Toll-like receptor 10                                                                         | TLR10    | 81793  | 2.42 | 699-1152(2.42) 277-293(1.42) 516-532(0.42) 861-877(0.42) 2114-2130(0.42) 2143-2159(0.42)                                                                                                                                                                                                                                                                                                                                          |
| 125 | 155111    | NM_032782 | HAVCR2                                   | Hepatitis A virus cellular receptor 2                                                         | HAVCR2   | 84868  | 0.88 | 21968-1984(0.83) 2282-2297(0.88)                                                                                                                                                                                                                                                                                                                                                                                                  |
| 111 | 334788    | NM_032815 | FUJ14639                                 | Nuclear factor of activated T-cells, cytoplasmic, calcineurin-dependent 2 interacting protein | NFATC2IP | 84901  | 0.71 | 21466-1481(0.71) 1593-1609(0.01)                                                                                                                                                                                                                                                                                                                                                                                                  |
| 299 | 9460      | NM_080867 | SP1                                      | Suppressor of cytokine signaling 4                                                            | SOC54    | 122809 | 1.42 | 3955-971(0.83) 2130-2146(0.01) 2555-2571(1.42)                                                                                                                                                                                                                                                                                                                                                                                    |
| 300 | 154295    | NM_138473 | SP3                                      | Sp3 transcription factor                                                                      | SP1      | 6667   | 0.01 | 11486-1482(0.01)<br>698-914(0.42) 2006-2022(0.42) 2234-2250(1.42) 2280-2296(1.42) 2351-2367(0.42) 2761-2776(0.88) 2898-2914(0.42) 4217-4231(0.01) 4319-4337(0.97) 4466-4481(1.71)                                                                                                                                                                                                                                                 |
| 298 | 353327    | NM_144849 | SOC5                                     | Suppressor of cytokine signaling 5                                                            | SOC5     | 9655   | 1.71 | 10                                                                                                                                                                                                                                                                                                                                                                                                                                |
| 223 | 110206    | NM_145185 | MAP2K7                                   |                                                                                               |          |        |      |                                                                                                                                                                                                                                                                                                                                                                                                                                   |
| 155 | 528402    | NM_172175 | IL15                                     | Data not found                                                                                |          |        | 3.42 | 4418-43(0.29) 806-822(0.83) 951-967(0.42) 1151-1167(3.42)                                                                                                                                                                                                                                                                                                                                                                         |
| 249 | 96149     | NM_172390 | NFATC1                                   |                                                                                               |          |        |      |                                                                                                                                                                                                                                                                                                                                                                                                                                   |
| 122 | 404338    | NM_173849 | GSC Gooseoid                             |                                                                                               |          |        |      |                                                                                                                                                                                                                                                                                                                                                                                                                                   |
| 210 | 445013    | NM_181657 | LTBR4                                    | Leukotriene B4 receptor                                                                       | LTBR4    | 1241   | 0.42 | 3437-453(0.42) 569-583(0.01) 937-952(0.29)                                                                                                                                                                                                                                                                                                                                                                                        |
| 334 | 256278    | TNFRSF1A  | TNFRSF1B                                 |                                                                                               |          |        |      |                                                                                                                                                                                                                                                                                                                                                                                                                                   |
| 342 | 2007      | TNFSF5    | TNFSF6                                   |                                                                                               |          |        |      |                                                                                                                                                                                                                                                                                                                                                                                                                                   |
| 139 | 413513    | NM_032491 | IKKB                                     |                                                                                               |          |        |      |                                                                                                                                                                                                                                                                                                                                                                                                                                   |
| 224 | 170610    | NM_042066 | MAP3K1                                   |                                                                                               |          |        |      |                                                                                                                                                                                                                                                                                                                                                                                                                                   |
| 231 | 851       | NM_053766 | MAP3K2                                   |                                                                                               |          |        |      |                                                                                                                                                                                                                                                                                                                                                                                                                                   |
| 244 | 270564    | NM_294897 | NAP4                                     |                                                                                               |          |        |      |                                                                                                                                                                                                                                                                                                                                                                                                                                   |

| Genes enriched in HuR RNP-IP (see Supplemental Table 1) that display HuR motifs |                                         |        |             |               |                                                                                                                                                                                                                             |
|---------------------------------------------------------------------------------|-----------------------------------------|--------|-------------|---------------|-----------------------------------------------------------------------------------------------------------------------------------------------------------------------------------------------------------------------------|
| Genes ranked according to p<0.05 in TNF+IFNγ-18h                                |                                         |        |             |               |                                                                                                                                                                                                                             |
| Name                                                                            | Symbol of HuR hits_4_collation 04-14-10 | GeneID | Motif Score | No. of Motifs | Motif Position                                                                                                                                                                                                              |
| Chemokine (C-C motif) ligand 2                                                  | CCL2                                    | 6347   | 2.42        | 4             | 455-471(1.01) 492-508(2.00) 524-540(0.42) 573-589(2.42)                                                                                                                                                                     |
| Chemokine (C-C motif) ligand 8                                                  | CCL8                                    | 6355   | 1.83        | 3             | 831-848(0.29) 870-884(0.43) 1109-1125(1.83)                                                                                                                                                                                 |
| Chemokine (C-X-C motif) ligand 2                                                | CXCL2                                   | 2920   | 1.42        | 4             | 589-605(1.42) 693-709(1.42) 885-901(0.25) 1008-1024(0.42)                                                                                                                                                                   |
| Mitogen-activated protein kinase 8                                              | MAPK8                                   | 5599   | 1.42        | 1             | 643-659(1.42)                                                                                                                                                                                                               |
| Transforming growth factor, alpha                                               | TGFA                                    | 7039   | 4           | 6             | 917-933(0.01) 1135-1151(1.42) 2161-2177(0.42) 3793-3809(0.42) 3891-3908(0.71) 4017-4033(4.00)                                                                                                                               |
| Chemokine (C-C motif) ligand 20                                                 | CCL20                                   | 6364   | 1.42        | 2             | 553-569(1.42) 754-768(1.42)                                                                                                                                                                                                 |
| Tumor necrosis factor (ligand) superfamily, member 11                           | TNFSF11                                 | 8600   | 2           | 4             | 1322-1338(0.42) 1572-1588(2.00) 1590-1606(1.42) 2159-2175(0.42)                                                                                                                                                             |
| Vav 1 guanine nucleotide exchange factor                                        | VAV1                                    | 7409   | 0.83        | 1             | 302-318(0.83)                                                                                                                                                                                                               |
| Tyrosine kinase 2                                                               | TYK2                                    | 7297   | 0.42        | 1             | 4054-4070(0.42)                                                                                                                                                                                                             |
| Casein kinase 2, alpha 1 polypeptide                                            | CSNK2A1                                 | 1457   | 1.42        | 3             | 922-937(0.29) 1710-1726(0.42) 2170-2186(1.42)                                                                                                                                                                               |
| Integrin, beta 7                                                                | ITGB7                                   | 3695   | 1.83        | 1             | 2246-2262(1.83)                                                                                                                                                                                                             |
| CD27 molecule                                                                   | CD27                                    | 939    | 5           | 1             | 789-805(5.00)                                                                                                                                                                                                               |
| Transforming growth factor, beta receptor 1                                     | TGFBR1                                  | 7046   | 2.42        | 3             | 223-239(0.42) 1641-1657(0.83) 2148-2164(2.42)                                                                                                                                                                               |
| Protein phosphatase 3 (formerly 2B), regulatory subunit B, alpha isoform        | PPP3R1                                  | 5534   | 1.88        | 2             | 1515-1530(1.88) 2290-2306(1.42)                                                                                                                                                                                             |
| Tumor necrosis factor receptor superfamily, member 21                           | TNFRSF21                                | 27242  | 0.83        | 6             | 882-898(0.83) 1761-1777(0.42) 2446-2462(0.42) 2616-2631(0.71) 2990-3006(0.83) 3207-3223(0.01)                                                                                                                               |
| Polycomb group ring finger 2                                                    | PCGF2                                   | 7703   | 0.29        | 1             | 1372-1387(0.29)                                                                                                                                                                                                             |
| Interleukin 6 (interferon, beta 2)                                              | IL6                                     | 3569   | 4           | 4             | 825-841(0.83) 879-895(4.00) 968-984(0.42) 1072-1088(3.00)                                                                                                                                                                   |
| Mitogen-activated protein kinase kinase kinase 2                                | MAP3K2                                  | 10746  | 3           | 7             | 1514-1530(0.42) 2035-2051(0.83) 2105-2120(1.88) 2133-2151(0.39) 2174-2190(3.00) 2699-2714(0.29) 2982-2999(0.42)                                                                                                             |
| TNF receptor-associated factor 1                                                | TRAF1                                   | 7185   | 0.42        | 1             | 1866-1882(0.42)                                                                                                                                                                                                             |
| SMAD family member 2                                                            | SMAD2                                   | 4087   | 0.71        | 4             | 1061-1077(0.42) 1897-1913(0.42) 2012-2028(0.42) 2153-2168(0.71)                                                                                                                                                             |
| Genes ranked according to p = 0.05 to 0.1 in TNF+IFNγ-18h                       |                                         |        |             |               |                                                                                                                                                                                                                             |
| Chemokine (C-C motif) ligand 13                                                 | CCL13                                   | 6357   | 3           | 2             | 524-540(3.00) 654-669(0.12)                                                                                                                                                                                                 |
| TGFB-induced factor homeobox 1                                                  | TGIF1                                   | 7050   | 1.83        | 2             | 1211-1227(0.42) 1349-1365(1.83)                                                                                                                                                                                             |
| Activating transcription factor 2                                               | ATF2                                    | 1386   | 1.39        | 6             | 269-285(0.42) 918-934(0.42) 1876-1894(1.39) 1902-1917(0.29) 1945-1960(0.13) 2044-2059(1.29)                                                                                                                                 |
| MYC associated factor X                                                         | MAX                                     | 4149   | 0.88        | 1             | 787-802(0.88)                                                                                                                                                                                                               |
| Runt-related transcription factor 1                                             | RUNX1                                   | 861    | 1.42        | 13            | 243-258(0.88) 2413-2429(0.83) 2518-2534(0.42) 2552-2568(1.42) 2577-2593(0.42) 2684-2700(1.42) 3598-3613(0.29) 3630-3646(1.42) 5064-5080(0.42) 5149-5164(0.71) 5236-5252(0.42) 5297-5313(1.42) 5413-5429(0.42)               |
| Chemokine (C-C motif) ligand 7                                                  | CCL7                                    | 6354   | 0.83        | 1             | 561-577(0.83)                                                                                                                                                                                                               |
| Fas ligand (TNF superfamily, member 6)                                          | FASLG                                   | 356    | 2.42        | 3             | 967-983(0.01) 1790-1805(0.29) 1812-1828(2.42)                                                                                                                                                                               |
| Vascular endothelial growth factor A                                            | VEGFA                                   | 7422   | 1.01        | 1             | 177-193(1.01)                                                                                                                                                                                                               |
| Chemokine (C-X-C motif) ligand 3                                                | CXCL3                                   | 2921   | 1           | 2             | 584-600(0.42) 665-681(1.00)                                                                                                                                                                                                 |
| Zinc finger protein, multitype 2                                                | ZFPM2                                   | 23414  | 1.42        | 4             | 3618-3632(1.01) 3709-3725(1.42) 3745-3761(0.42) 3762-3778(1.25)                                                                                                                                                             |
| Activin A receptor, type IIA                                                    | ACVR2A                                  | 92     | 2           | 5             | 456-472(0.42) 631-645(0.42) 1780-1796(1.01) 2122-2138(2.00) 2168-2184(0.42)                                                                                                                                                 |
| Leukotriene B4 receptor                                                         | LTB4R                                   | 1241   | 0.42        | 3             | 437-453(0.42) 569-583(0.01) 937-952(0.29)                                                                                                                                                                                   |
| Chemokine (C-C motif) ligand 18 (pulmonary and activation-regulated)            | CCL18                                   | 6362   | 1           | 1             | 509-525(1.00)                                                                                                                                                                                                               |
| Transforming growth factor, beta receptor III                                   | TGFBR3                                  | 7049   | 1           | 2             | 3615-3631(1.00) 3815-3831(0.83)                                                                                                                                                                                             |
| Vav 3 guanine nucleotide exchange factor                                        | VAV3                                    | 10451  | 1.71        | 7             | 356-372(0.42) 864-880(0.42) 1981-1997(0.01) 3007-3023(0.42) 3547-3563(0.42) 4175-4191(0.42) 4712-4729(1.71)                                                                                                                 |
| Chemokine (C-C motif) receptor 5                                                | CCRS5                                   | 1234   | 1.55        | 3             | 1835-1850(0.29) 3145-3161(0.42) 3583-3598(1.55)                                                                                                                                                                             |
| B-cell CLL/lymphoma 2                                                           | BCL2                                    | 596    | 3.42        | 14            | 806-822(0.83) 963-979(0.42) 1456-1472(0.25) 1545-1560(0.29) 2248-2264(0.42) 2401-2417(1.42) 2831-2847(0.01) 3216-3232(0.01) 3257-3273(0.42) 3706-3722(0.25) 4184-4200(3.42) 5047-5063(0.01) 5114-5130(1.42) 5937-5953(0.42) |
| Angiotensinogen (serpin peptidase inhibitor, clade A, member 8)                 | AGT                                     | 183    | 0.42        | 1             | 1865-1881(0.42)                                                                                                                                                                                                             |

|                                                                        |           |        |             |           |                                                                                                                                                                                                                                                                                                                                                                                                              |
|------------------------------------------------------------------------|-----------|--------|-------------|-----------|--------------------------------------------------------------------------------------------------------------------------------------------------------------------------------------------------------------------------------------------------------------------------------------------------------------------------------------------------------------------------------------------------------------|
| Collagen, type III, alpha 1                                            | COL3A1    | 1281   | 2.42        | 2         | 5007-5023(0.01) 5099-5115(2.42)                                                                                                                                                                                                                                                                                                                                                                              |
| Interferon, beta 1, fibroblast                                         | IFNB1     | 3456   | 1.42        | 2         | 683-699(1.42) 721-737(1.42)                                                                                                                                                                                                                                                                                                                                                                                  |
|                                                                        |           |        |             |           |                                                                                                                                                                                                                                                                                                                                                                                                              |
| Toll-like receptor 9                                                   | TLR9      | 54106  | 1.83        | 1         | 351-367(1.83)                                                                                                                                                                                                                                                                                                                                                                                                |
| Protein tyrosine phosphatase, receptor type, C                         | PTPRC     | 5788   | 2.42        | 7         | 362-378(0.83) 794-810(1.42) 1120-1136(0.42) 2722-2737(1.29) 3823-3839(0.42) 4752-4768(1.00) 4845-4861(2.42)                                                                                                                                                                                                                                                                                                  |
| Tumor necrosis factor receptor superfamily, member 11a, NFKB activator | TNFRSF11A | 8792   | 2.42        | 2         | 2035-2051(1.42) 2700-2716(2.42)                                                                                                                                                                                                                                                                                                                                                                              |
| Toll-like receptor 5                                                   | TLR5      | 7100   | 2.42        | 3         | 426-441(0.13) 1133-1149(2.42) 3305-3321(0.42)                                                                                                                                                                                                                                                                                                                                                                |
|                                                                        |           |        |             |           |                                                                                                                                                                                                                                                                                                                                                                                                              |
| Chemokine (C-C motif) receptor 1                                       | CCR1      | 1230   | 0.71        | 1         | 1618-1635(0.71)                                                                                                                                                                                                                                                                                                                                                                                              |
| Tumor necrosis factor (TNF superfamily, member 2)                      | TNF       | 7124   | 2.42        | 1         | 1331-1347(2.42)                                                                                                                                                                                                                                                                                                                                                                                              |
| Interleukin 12 receptor, beta 2                                        | IL12RB2   | 3595   | 1.42        | 3         | 2484-2500(1.42) 3390-3405(0.29) 3774-3790(0.83)                                                                                                                                                                                                                                                                                                                                                              |
|                                                                        |           |        |             |           |                                                                                                                                                                                                                                                                                                                                                                                                              |
| Nitric oxide synthase 2, inducible                                     | NOS2      | 4843   | 0.42        | 1         | 277-293(0.42)                                                                                                                                                                                                                                                                                                                                                                                                |
| T-box 21                                                               | TBX21     | 30009  | 0.29        | 1         | 1967-1982(0.29) T-bet                                                                                                                                                                                                                                                                                                                                                                                        |
| Interleukin 5 (colony-stimulating factor, eosinophil)                  | IL5       | 3567   | 1.29        | 2         | 723-739(0.25) 776-793(1.29)                                                                                                                                                                                                                                                                                                                                                                                  |
| CD86 molecule                                                          | CD86      | 942    | 0.83        | 3         | 1115-1131(0.01) 1188-1204(0.42) 2548-2564(0.83)                                                                                                                                                                                                                                                                                                                                                              |
| Toll-like receptor 7                                                   | TLR7      | 51284  | 0.84        | 2         | 3097-3113(0.84) 3337-3353(0.42)                                                                                                                                                                                                                                                                                                                                                                              |
|                                                                        |           |        |             |           |                                                                                                                                                                                                                                                                                                                                                                                                              |
| Src-like adaptor                                                       | SLA       | 6503   | 0.42        | 1         | 1153-1169(0.42)                                                                                                                                                                                                                                                                                                                                                                                              |
| Chemokine (C-X-C motif) ligand 6 (granulocyte chemotactic protein 2)   | CXCL6     | 6372   | 1.36        | 5         | 496-513(1.36) 626-642(0.42) 734-750(0.01) 789-804(0.29) 1311-1327(0.42)                                                                                                                                                                                                                                                                                                                                      |
| Teratocarcinoma-derived growth factor 1                                | TGDF1     | 6997   | 1.42        | 2         | 1409-1425(1.01) 1476-1492(1.42)                                                                                                                                                                                                                                                                                                                                                                              |
| TNF receptor-associated factor 5                                       | TRAF5     | 7188   | 1.83        | 4         | 1871-1887(0.83) 2692-2707(0.29) 3067-3083(0.42) 3253-3269(1.83)                                                                                                                                                                                                                                                                                                                                              |
| Toll-like receptor 6                                                   | TLR6      | 10333  | 2.42        | 4         | 954-970(2.42) 1129-1142(0.16) 1265-1281(0.42) 1533-1549(0.01)                                                                                                                                                                                                                                                                                                                                                |
| Chemokine (C-C motif) receptor 8                                       | CCR8      | 1237   | 1.42        | 3         | 1928-1943(0.29) 2326-2342(1.42) 2351-2367(0.42)                                                                                                                                                                                                                                                                                                                                                              |
| Mitogen-activated protein kinase 10                                    | MAPK10    | 5602   | 2.42        | 2         | 963-979(2.42) 1915-1931(2.42)                                                                                                                                                                                                                                                                                                                                                                                |
|                                                                        |           |        | 1.29        | 4         | 740-755(0.29) 2231-2244(0.75) 2690-2706(0.42) 3120-3137(1.29)                                                                                                                                                                                                                                                                                                                                                |
| Toll-like receptor 3                                                   | TLR3      | 7098   | 2.42        | 4         | 1408-1423(0.29) 2068-2084(2.42) 2533-2549(1.42) 2812-2827(1.29)                                                                                                                                                                                                                                                                                                                                              |
| Myogenic factor 5                                                      | MYF5      | 4617   | 1           | 2         | 1010-1026(0.42) 1116-1132(1.00)                                                                                                                                                                                                                                                                                                                                                                              |
|                                                                        |           |        |             |           |                                                                                                                                                                                                                                                                                                                                                                                                              |
| Chemokine (C-X3-C motif) receptor 1                                    | CX3CR1    | 1524   | 0.29        | 1         | 2963-2978(0.29)                                                                                                                                                                                                                                                                                                                                                                                              |
| Toll-like receptor 10                                                  | TLR10     | 81793  | 2.42        | 6         | 99-115(2.42) 277-293(1.42) 516-532(0.42) 861-877(0.42) 2114-2130(0.42) 2143-2159(0.42)                                                                                                                                                                                                                                                                                                                       |
|                                                                        |           |        |             |           |                                                                                                                                                                                                                                                                                                                                                                                                              |
| TNF receptor-associated factor 6                                       | TRAF6     | 7189   | 1.84        | 2         | 1326-1342(0.83) 2459-2475(1.84)                                                                                                                                                                                                                                                                                                                                                                              |
| V-rel reticuloendotheliosis viral oncogene homolog (avian)             | REL       | 5966   | 1.42        | 4         | 1747-1763(0.01) 2047-2062(1.29) 2127-2143(1.42) 2165-2180(0.29) c-Rel                                                                                                                                                                                                                                                                                                                                        |
|                                                                        |           |        |             |           |                                                                                                                                                                                                                                                                                                                                                                                                              |
| Tumor necrosis factor (ligand) superfamily, member 4                   | TNFSF4    | 7292   | 1.88        | 3         | 1903-1919(1.42) 3276-3292(0.01) 3414-3429(1.88)                                                                                                                                                                                                                                                                                                                                                              |
| Suppressor of cytokine signaling 4                                     | Socs4     | 122809 | 1.42        | 3         | 955-971(0.83) 2130-2146(0.01) 2555-2571(1.42)                                                                                                                                                                                                                                                                                                                                                                |
| Transcription factor CP2                                               | TFCP2     | 7024   | 1.71        | 3         | 1473-1489(0.42) 1590-1605(1.71) 2330-2347(0.29) human CP2                                                                                                                                                                                                                                                                                                                                                    |
| Nucleoporin 214kDa                                                     | NUP214    | 8021   | 0.42        | 1         | 1313-1329(0.42)                                                                                                                                                                                                                                                                                                                                                                                              |
|                                                                        |           |        |             |           |                                                                                                                                                                                                                                                                                                                                                                                                              |
| P21 protein (Cdc42/Rac)-activated kinase 1                             | PAK1      | 5058   | 0.42        | 2         | 849-863(0.42) 1408-1424(0.42)                                                                                                                                                                                                                                                                                                                                                                                |
|                                                                        |           |        |             |           |                                                                                                                                                                                                                                                                                                                                                                                                              |
| Interleukin 19                                                         | IL19      | 29949  | 1.83        | 1         | 656-672(1.83)                                                                                                                                                                                                                                                                                                                                                                                                |
|                                                                        |           |        |             |           | 2445-2461(0.42) 4094-4110(1.42) 5867-5883(0.42) 6006-6022(0.42) 6441-6457(0.01) 7981-7997(1.42) 8214-8229(0.29) 8282-8298(0.42) 8554-8570(2.42) 8718-8734(0.42) 9042-9057(0.29) 9689-9705(0.42) 9723-9737(0.42) 9900-9916(0.42) 10026-10042(2.42) 10572-10588(2.00) 10831-10847(2.00) 10852-10868(0.42) 11657-11673(0.42) 11789-11803(0.01) 12317-12333(1.83) 12706-12722(0.42) 13796-13811(0.29)NFAT5 human |
| Nuclear factor of activated T-cells 5, tonicity-responsive             | NFAT5     | 10725  | 2.42        | 23        |                                                                                                                                                                                                                                                                                                                                                                                                              |
|                                                                        |           |        |             |           |                                                                                                                                                                                                                                                                                                                                                                                                              |
| Activin A receptor, type I                                             | ACVR1     | 90     | 3           | 5         | 1516-1532(0.42) 1869-1885(0.83) 2566-2582(0.25) 2656-2672(3.00) 2820-2836(2.42)                                                                                                                                                                                                                                                                                                                              |
| IL2-inducible T-cell kinase                                            | ITK       | 3702   | 0.42        | 2         | 1197-1212(0.29) 3981-3997(0.42)                                                                                                                                                                                                                                                                                                                                                                              |
| Interleukin 11                                                         | IL11      | 3589   | 0.42        | 2         | 1555-1571(0.42) 2243-2258(0.12)                                                                                                                                                                                                                                                                                                                                                                              |
|                                                                        |           |        |             |           |                                                                                                                                                                                                                                                                                                                                                                                                              |
|                                                                        |           |        | 1.42        | 4         | 1004-1020(0.42) 3194-3210(0.83) 3634-3652(0.39) 3821-3837(1.42)                                                                                                                                                                                                                                                                                                                                              |
| Toll-like receptor 2                                                   | TLR2      | 7097   | 1           | 4         | 426-442(0.42) 686-702(0.01) 1020-1036(1.00) 2467-2483(0.42)                                                                                                                                                                                                                                                                                                                                                  |
| TNF receptor-associated factor 3                                       | TRAF3     | 7187   | 0.42        | 2         | 2172-2188(0.42) 2342-2358(0.42)                                                                                                                                                                                                                                                                                                                                                                              |
| Suppressor of cytokine signaling 2                                     | Socs2     | 8835   | 0.42        | 1         | 1458-1474(0.42)                                                                                                                                                                                                                                                                                                                                                                                              |
|                                                                        |           |        |             |           |                                                                                                                                                                                                                                                                                                                                                                                                              |
| Suppressor of cytokine signaling 6                                     | Socs6     | 9306   | 1.42        | 4         | 1846-1862(0.42) 1976-1992(1.42) 2281-2296(0.29) 2415-2431(0.25)                                                                                                                                                                                                                                                                                                                                              |
| Mitogen-activated protein kinase kinase kinase 7                       | MAP3K7    | 6885   | 1.29        | 3         | 1264-1280(0.42) 1388-1403(0.29) 2087-2102(1.29)                                                                                                                                                                                                                                                                                                                                                              |
|                                                                        |           |        |             |           |                                                                                                                                                                                                                                                                                                                                                                                                              |
| Vascular cell adhesion molecule 1                                      | VCAM1     | 7412   | 1.42        | 5         | 449-465(0.42) 1031-1047(0.42) 2843-2858(0.88) 3038-3055(0.29) 3064-3080(1.42)                                                                                                                                                                                                                                                                                                                                |
| Myeloid differentiation primary response gene (88)                     | MYD88     | 4615   | 1           | 1         | 1045-1061(1.00)                                                                                                                                                                                                                                                                                                                                                                                              |
|                                                                        |           |        | 1.44        | 3.36      |                                                                                                                                                                                                                                                                                                                                                                                                              |
|                                                                        |           |        | <b>2.06</b> | <b>29</b> |                                                                                                                                                                                                                                                                                                                                                                                                              |
|                                                                        |           |        |             | 0.67      |                                                                                                                                                                                                                                                                                                                                                                                                              |
